# Supplementary material for: Neuroprotective Effects of Chemical Constituents of Leaves of Euonymus hamiltonianus Wall.
Source: MDPI journal article supplement (doi:10.3390/plants13081094), 2024-04-13
Supplement: s1 [file s1]

# Neuroprotective Effects of Chemical Constituents of Leaves of *Euonymus hamiltonianus* Wall.

Huynh Nguyen Khanh Tran <sup>1,†</sup>, Jae Sik Yu <sup>2,†</sup>, Tianqi Huang <sup>1,2</sup>, Gakyung Lee <sup>2</sup>, Hyo Sun Choi <sup>1</sup> and Hyun Ok Yang <sup>2,\*</sup>

<sup>1</sup> Natural Products Research Center, Korea Institute of Science and Technology, Gangneung 25451, Republic of Korea; hnktran2404@gmail.com (H.N.K.T.); 618509@kist.re.kr (T.H.); ewchoi10@gmail.com (H.S.C.)

<sup>2</sup> Department of Integrative Biological Sciences and Industry & Convergence Research Center for Natural Products, Sejong University, 209 Neungdong-ro, Gwangjin-gu, Seoul 05006, Republic of Korea; jsyu@sejong.ac.kr (J.S.Y.); lgg1025@sejong.ac.kr (G.L.)

\* Correspondence: hoyang@sejong.ac.kr; Tel.: +82-2-3408-1959; Fax: +82-2-3408-4336

† These authors contributed equally to this work.

## List of Figures

**Figure S1.** Inhibition of A $\beta$ 42 production from fractions of *E. hamiltonianus* in HelaAPP cells.

**Figure S2.1.** HR-ESIMS spectrum of compound **1**

**Figure S2.2.**  $^1\text{H}$ -NMR spectrum of compound **1** in DMSO- $d_6$  at 500 MHz

**Figure S2.3.**  $^{13}\text{C}$ -NMR spectrum of compound **1** in DMSO- $d_6$  at 125 MHz

**Figure S2.4.** HSQC spectrum of compound **1** in DMSO- $d_6$

**Figure S2.5.** COSY spectrum of compound **1** in DMSO- $d_6$

**Figure S2.6.** HMBC spectrum of compound **1** in DMSO- $d_6$

**Figure S3.1.** HR-ESIMS spectrum of compound **2**

**Figure S3.2.**  $^1\text{H}$ -NMR spectrum of compound **2** in DMSO- $d_6$  at 500 MHz

**Figure S3.3.**  $^{13}\text{C}$ -NMR spectrum of compound **2** in DMSO- $d_6$  at 125 MHz

**Figure S3.4.** HSQC spectrum of compound **2** in DMSO- $d_6$

**Figure S3.5.** COSY spectrum of compound **2** in DMSO- $d_6$

**Figure S3.6.** HMBC spectrum of compound **2** in DMSO- $d_6$

**Figure S3.7.** LC-MS spectrum of compound **2**

**Figure S3.8.** Purity of compound **2**

**Figure S3.9.** LC-MS analysis of compound **2** compared to 30% extract

**Figure S3.10.** LC-MS analysis of compound **1** compared to 30% extract

**Figure S4.1.** HR-ESIMS spectrum of compound **10**

**Figure S4.2.**  $^1\text{H}$ -NMR spectrum of compound **10** in DMSO- $d_6$  at 500 MHz

**Figure S4.3.** HSQC spectrum of compound **10** in DMSO- $d_6$

**Figure S4.4.** COSY spectrum of compound **10** in DMSO- $d_6$

**Figure S4.5.** HMBC spectrum of compound **10** in DMSO- $d_6$

**Figure S5.1.** HR-ESIMS spectrum of compound **11**

**Figure S5.2.**  $^1\text{H}$ -NMR spectrum of compound **11** in methanol- $d_4$  at 400 MHz

**Figure S5.3.**  $^{13}\text{C}$ -NMR spectrum of compound **11** in methanol- $d_4$  at 100 MHz

**Figure S5.4.** HSQC spectrum of compound **11** in methanol-*d*<sub>4</sub>

**Figure S5.5.** COSY spectrum of compound **11** in methanol-*d*<sub>4</sub>

**Figure S5.6.** HMBC spectrum of compound **11** in methanol-*d*<sub>4</sub>

**Figure S6.** HPLC pattern of sugar

**Figure S7.1.** <sup>1</sup>H-NMR spectrum of compound **3** in methanol-*d*<sub>4</sub> at 400 MHz

**Figure S7.2.** <sup>13</sup>C-NMR spectrum of compound **3** in methanol-*d*<sub>4</sub> at 100 MHz

**Figure S8.1.** <sup>1</sup>H-NMR spectrum of compound **4** in DMSO-*d*<sub>6</sub> at 400 MHz

**Figure S8.2.** <sup>13</sup>C-NMR spectrum of compound **4** in DMSO-*d*<sub>6</sub> at 100 MHz

**Figure S9.1.** <sup>1</sup>H-NMR spectrum of compound **5** in DMSO-*d*<sub>6</sub> at 400 MHz

**Figure S9.2.** <sup>13</sup>C-NMR spectrum of compound **5** in DMSO-*d*<sub>6</sub> at 100 MHz

**Figure S10.1.** <sup>1</sup>H-NMR spectrum of compound **6** in DMSO-*d*<sub>6</sub> at 400 MHz

**Figure S10.2.** <sup>13</sup>C-NMR spectrum of compound **6** in DMSO-*d*<sub>6</sub> at 100 MHz

**Figure S11.1.** <sup>1</sup>H-NMR spectrum of compound **7** in DMSO-*d*<sub>6</sub> at 400 MHz

**Figure S11.2.** <sup>13</sup>C-NMR spectrum of compound **7** in DMSO-*d*<sub>6</sub> at 100 MHz

**Figure S12.1.** <sup>1</sup>H-NMR spectrum of compound **8** in DMSO-*d*<sub>6</sub> at 400 MHz

**Figure S12.2.** <sup>13</sup>C-NMR spectrum of compound **8** in DMSO-*d*<sub>6</sub> at 100 MHz

**Figure S13.1.** <sup>1</sup>H-NMR spectrum of compound **9** in DMSO-*d*<sub>6</sub> at 400 MHz

**Figure S13.2.** <sup>13</sup>C-NMR spectrum of compound **9** in DMSO-*d*<sub>6</sub> at 100 MHz

**Figure S14.1.** <sup>1</sup>H-NMR spectrum of compound **12** in DMSO-*d*<sub>6</sub> at 400 MHz

**Figure S14.2.** <sup>13</sup>C-NMR spectrum of compound **12** in DMSO-*d*<sub>6</sub> at 100 MHz

**Figure S15.1.** <sup>1</sup>H-NMR spectrum of compound **13** in DMSO-*d*<sub>6</sub> at 400 MHz

**Figure S15.2.** <sup>13</sup>C-NMR spectrum of compound **13** in DMSO-*d*<sub>6</sub> at 100 MHz

**Figure S16.1.** <sup>1</sup>H-NMR spectrum of compound **14** in DMSO-*d*<sub>6</sub> at 400 MHz

**Figure S16.2.** <sup>13</sup>C-NMR spectrum of compound **14** in DMSO at 100 MHz

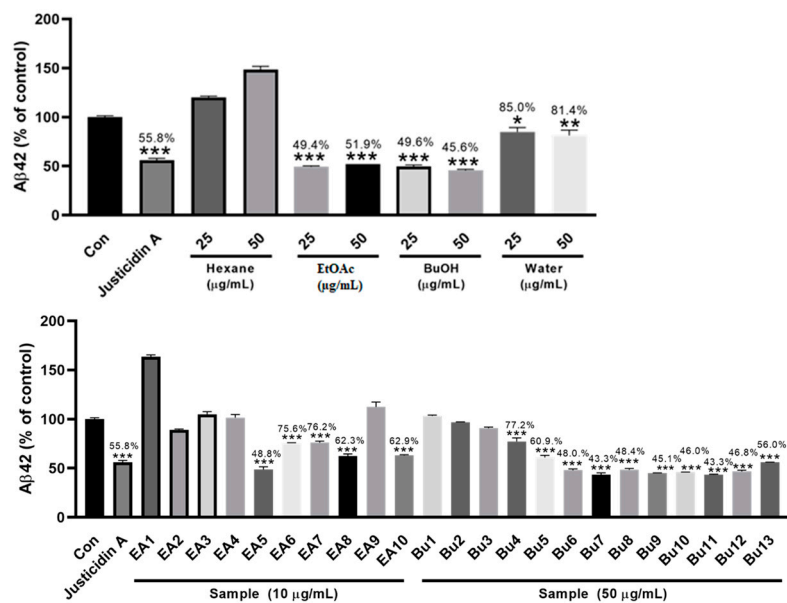

**Figure S1.** Inhibition of Aβ42 production from fractions of *E. hamiltonianus* in HelaAPP cells.

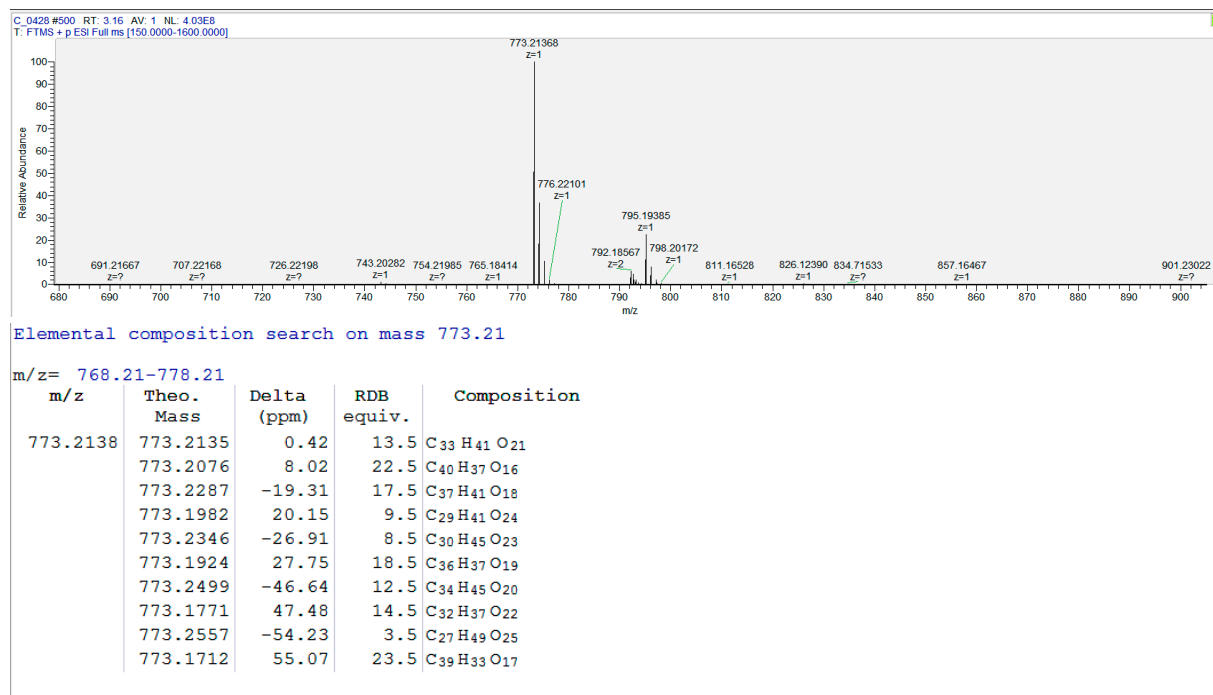

**Figure S2.1.** HR-ESIMS spectrum of compound 1



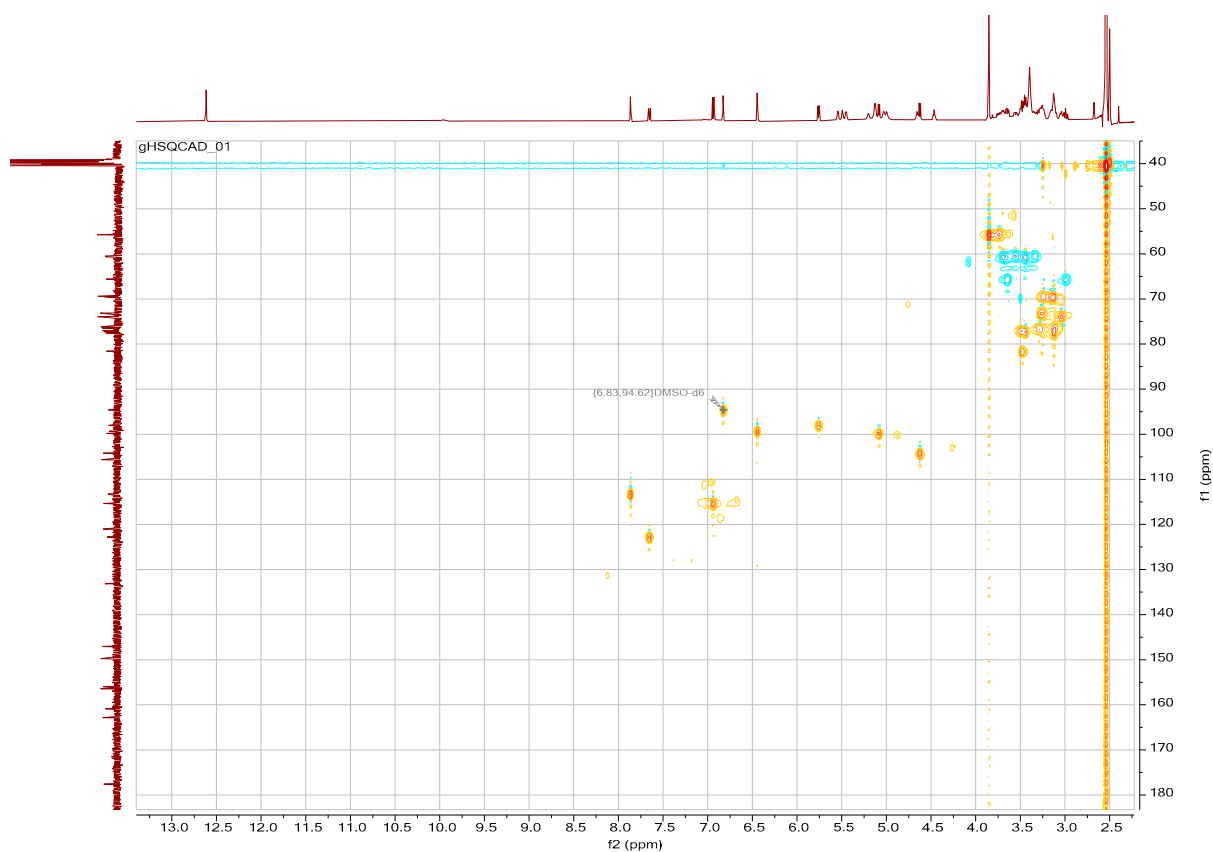

Figure S2.4. HSQC spectrum of compound **1** in DMSO-*d*<sub>6</sub>

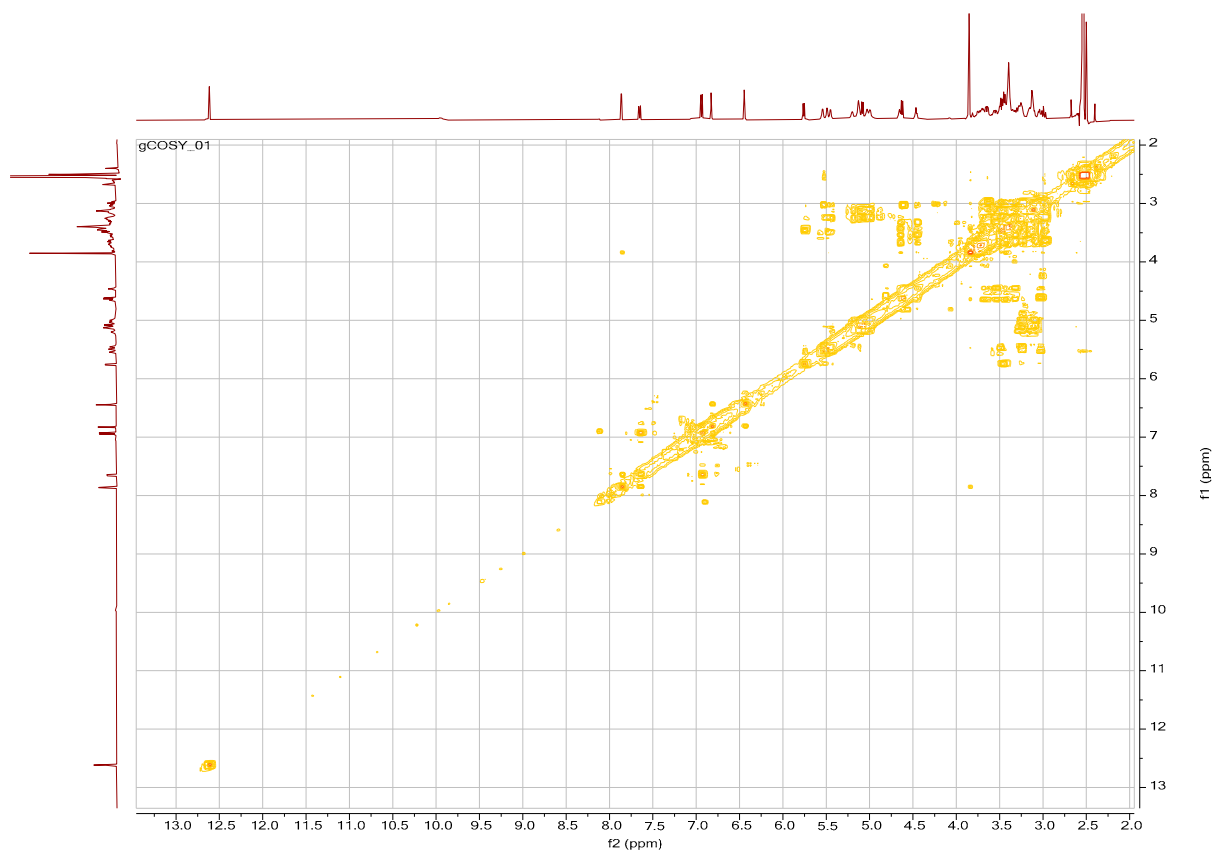

Figure S2.5. COSY spectrum of compound **1** in DMSO-*d*<sub>6</sub>

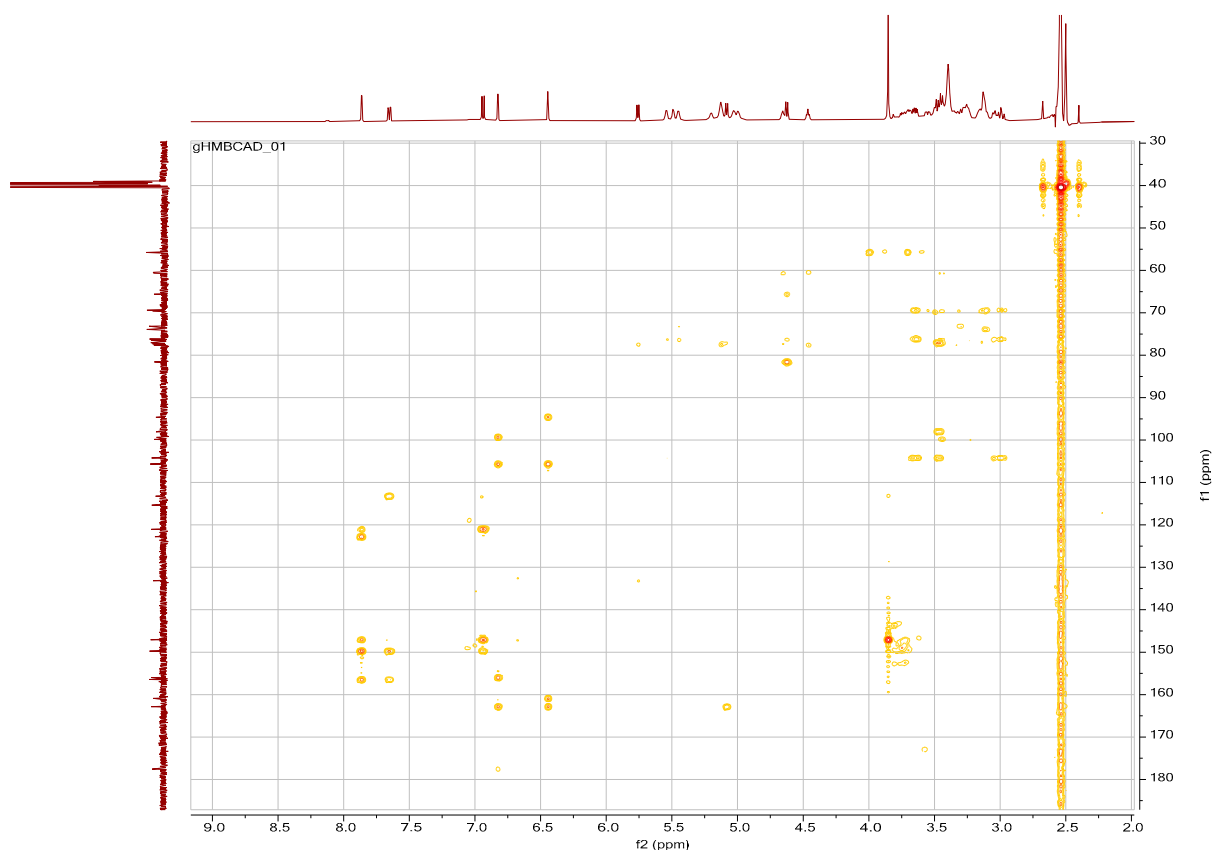

**Figure S2.6.** HMBC spectrum of compound **1** in DMSO- $d_6$

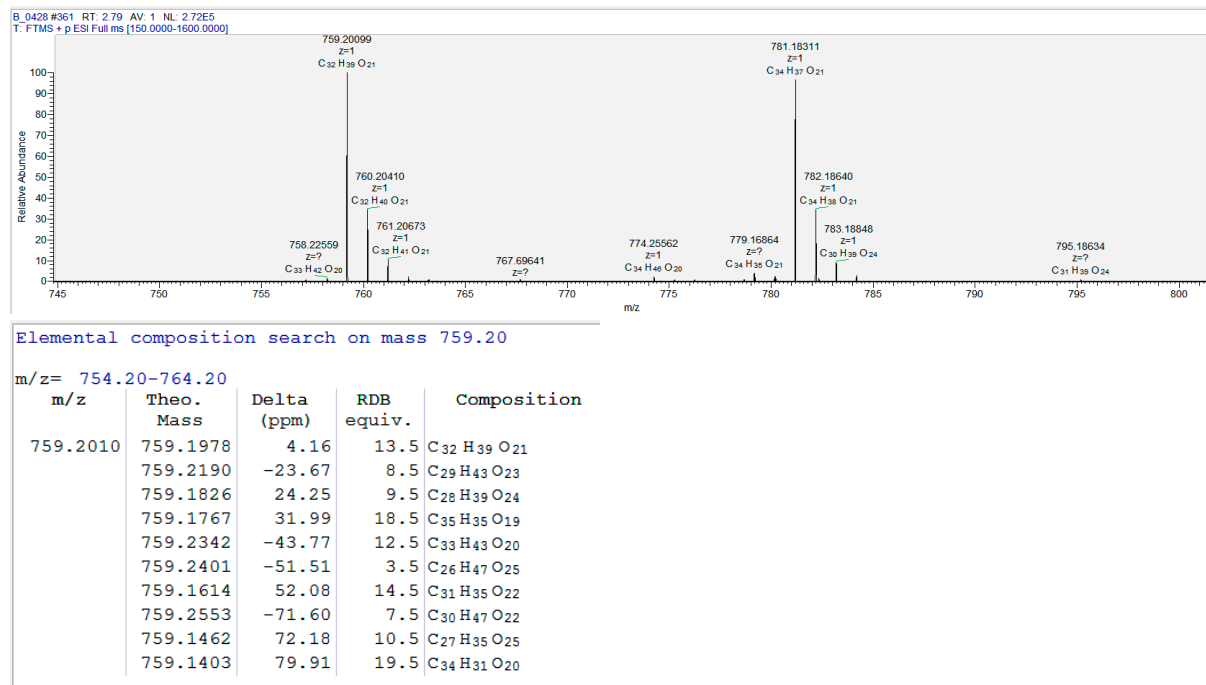

**Figure S3.1.** HR-ESIMS spectrum of compound **2**

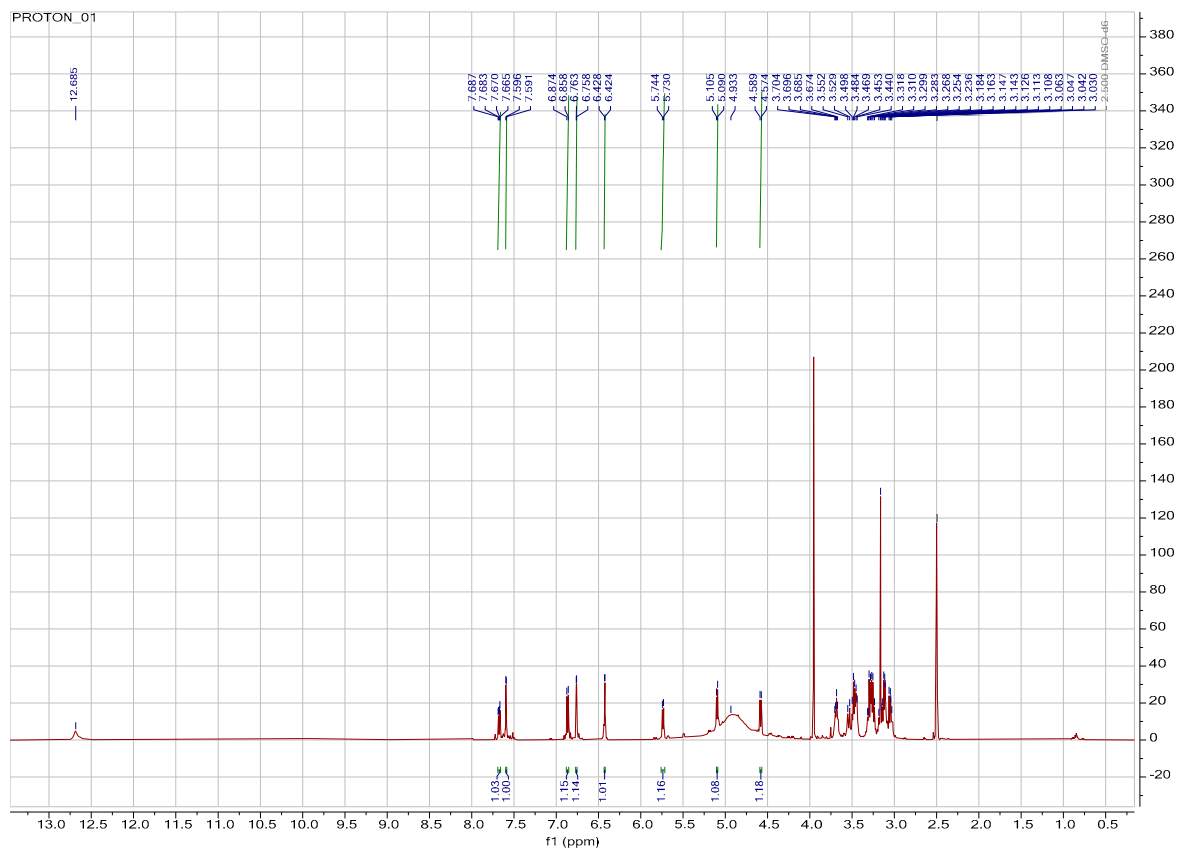

**Figure S3.2.**  $^1\text{H}$ -NMR spectrum of compound **2** in  $\text{DMSO}-d_6$  at 500 MHz

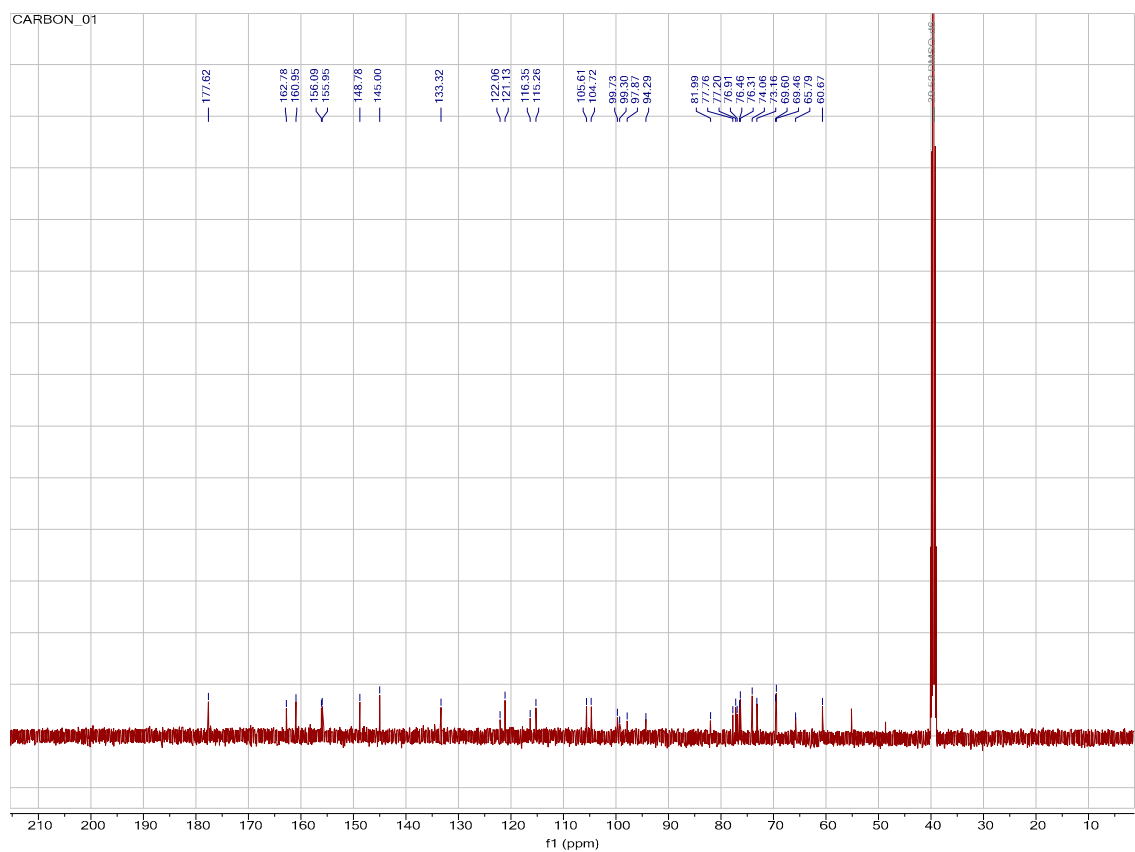

**Figure S3.3.**  $^{13}\text{C}$ -NMR spectrum of compound **2** in  $\text{DMSO}-d_6$  at 125 MHz



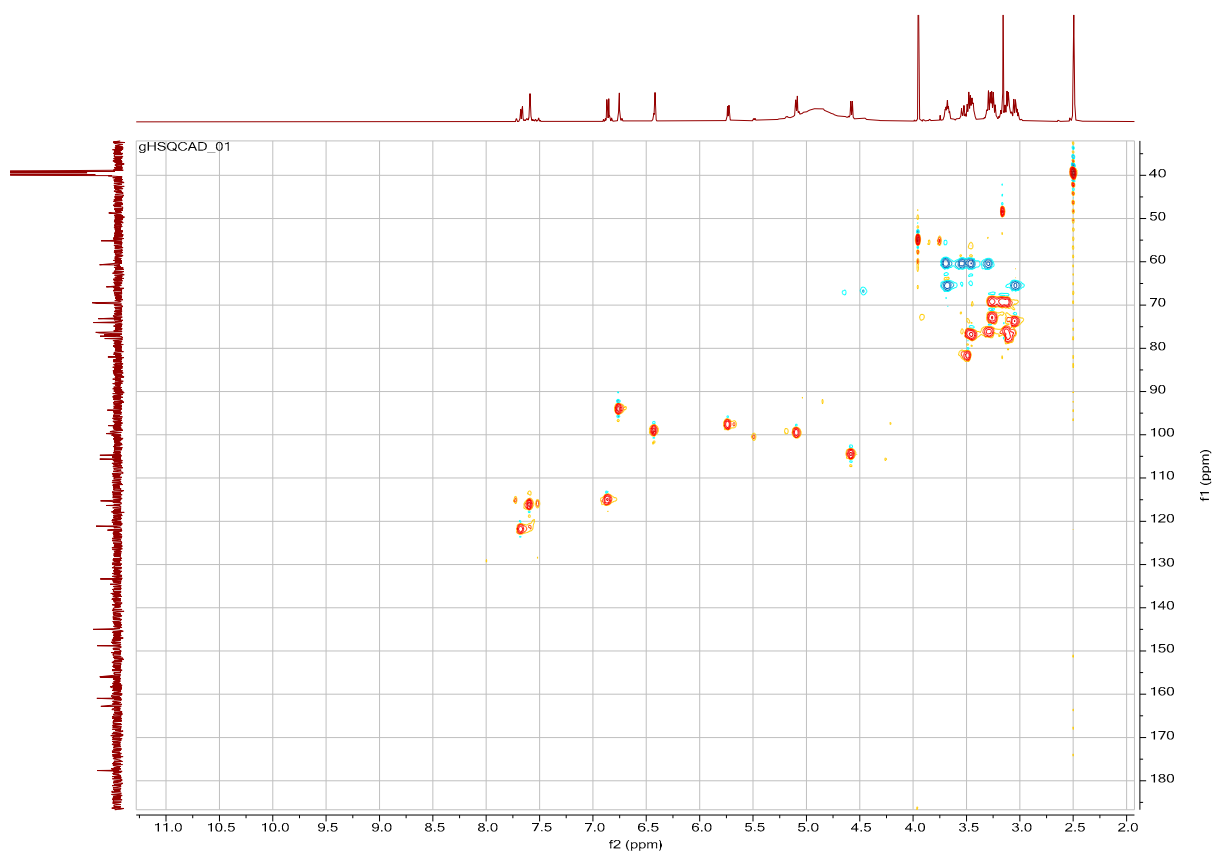

**Figure S3.4.** HSQC spectrum of compound **2** in DMSO- $d_6$

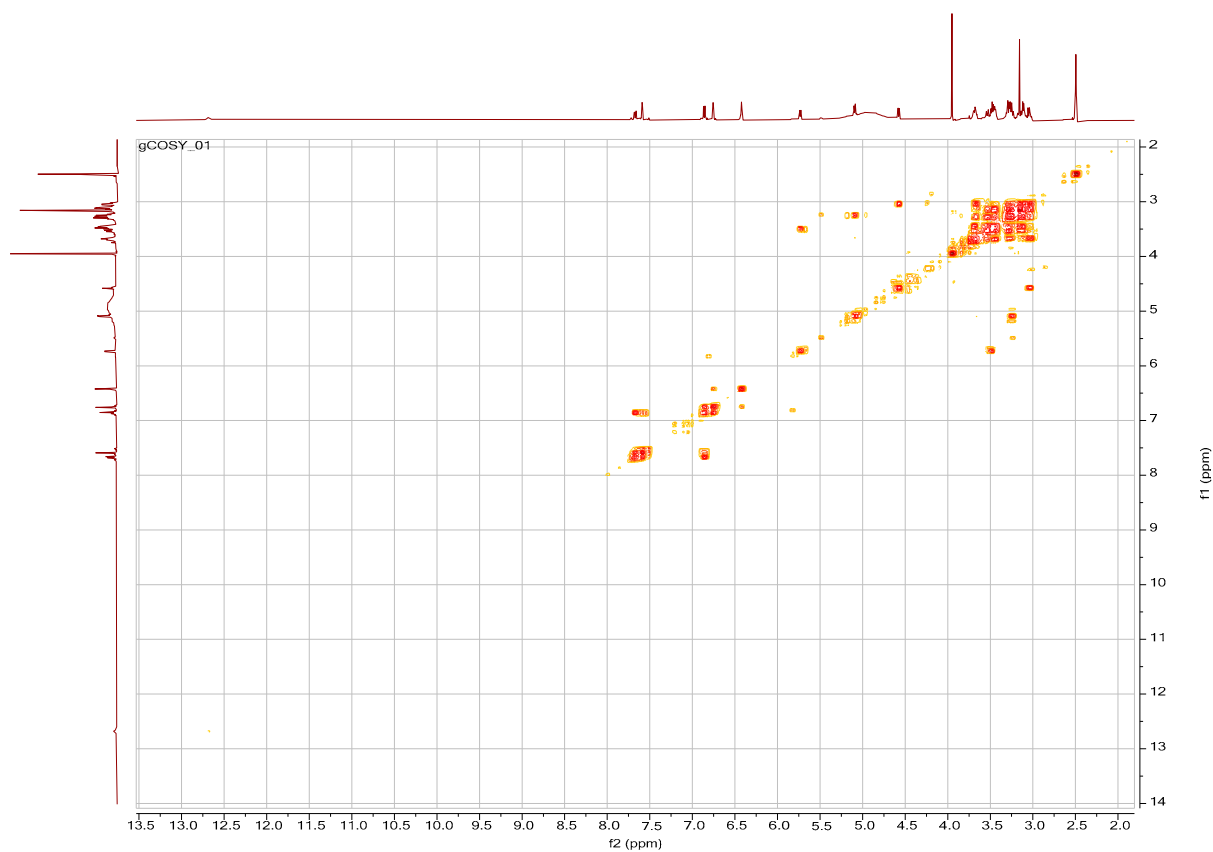

**Figure S3.5.** COSY spectrum of compound **2** in DMSO- $d_6$

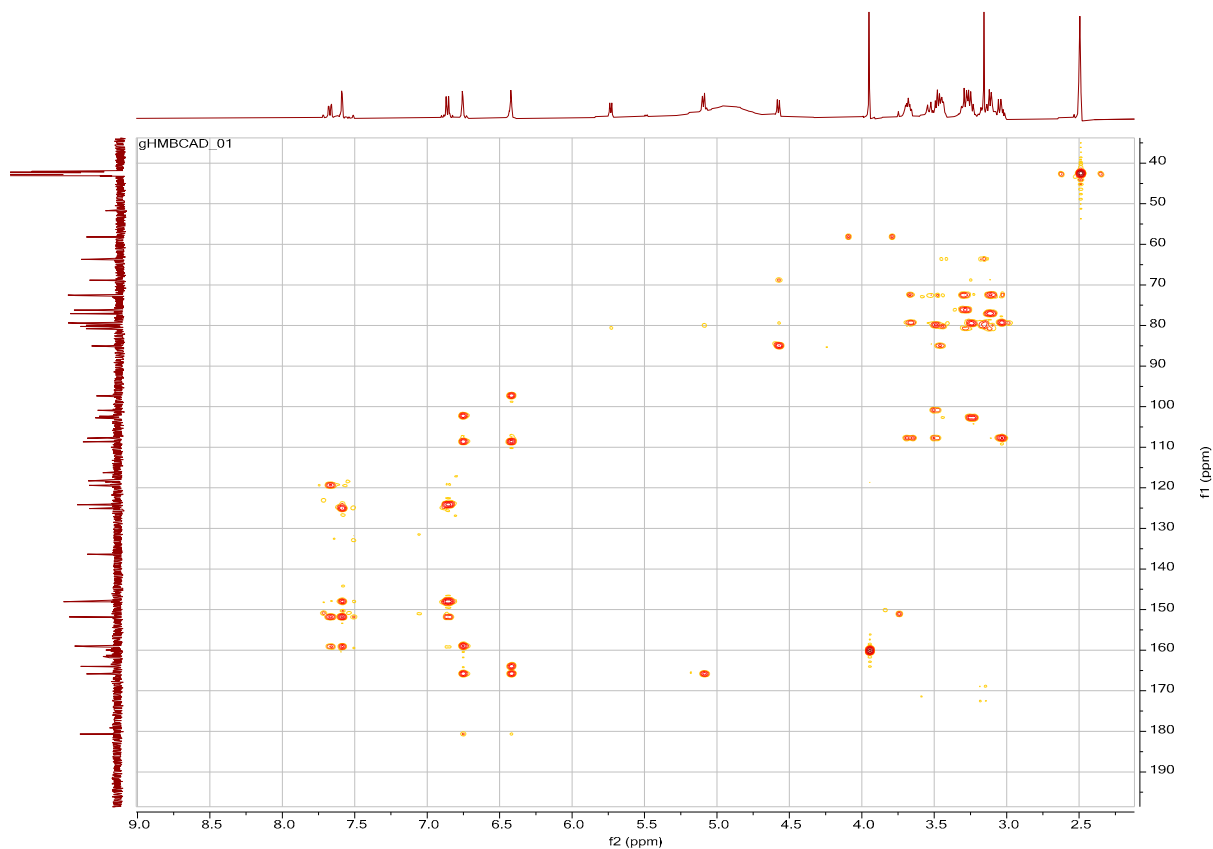

**Figure S3.6.** HMBC spectrum of compound **2** in DMSO-*d*<sub>6</sub>

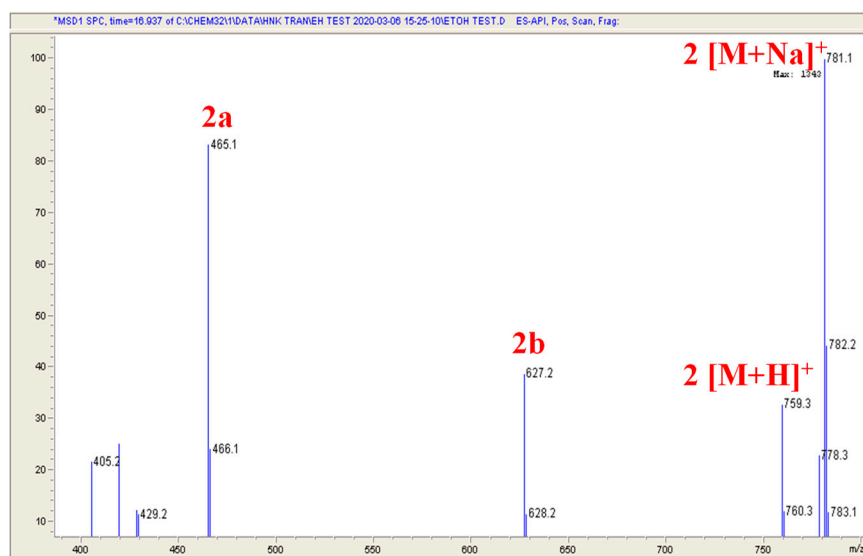

**Figure S3.7.** LC-MS chromatogram of compound **2**

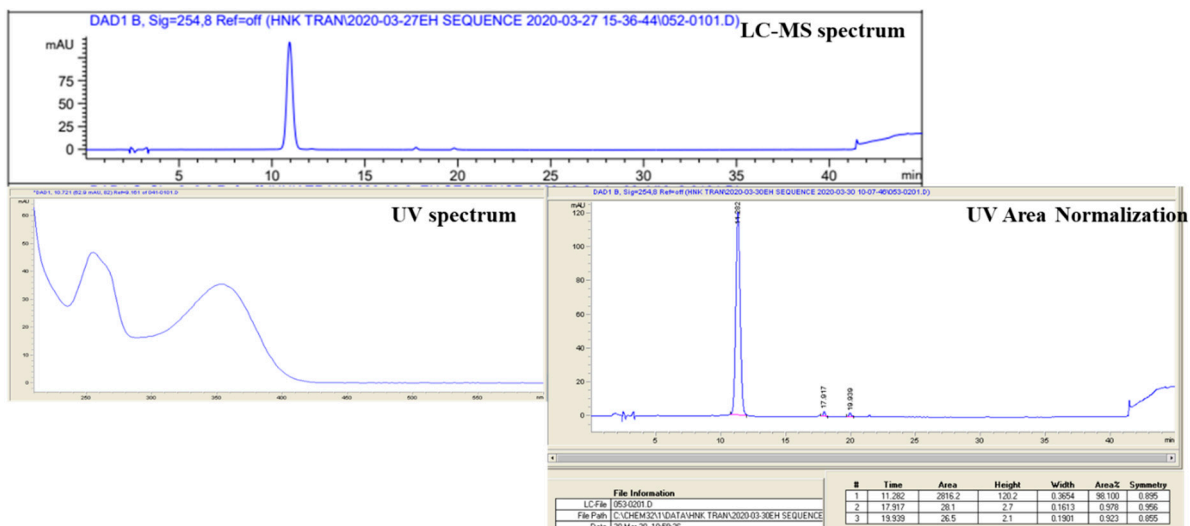

**Figure S3.8** Purity of Compound **2**

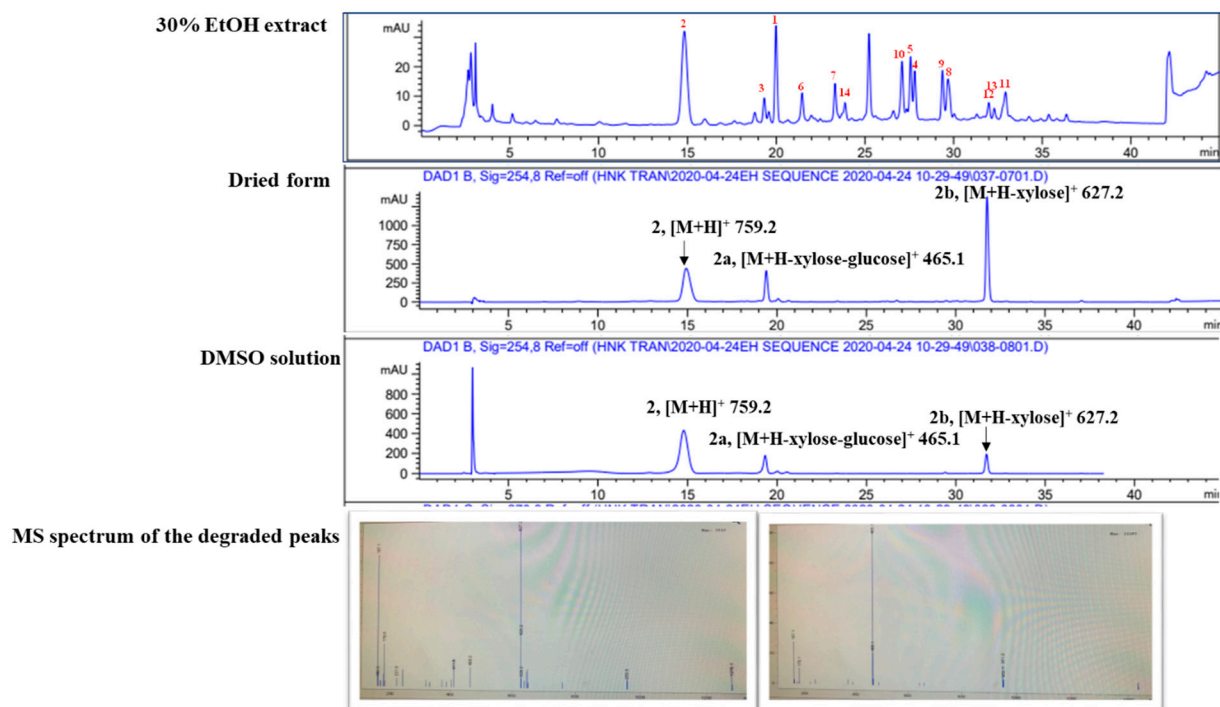

**Figure S3.9.** LC-MS analysis of compound **2** compared to 30% extract

30% EtOH extract

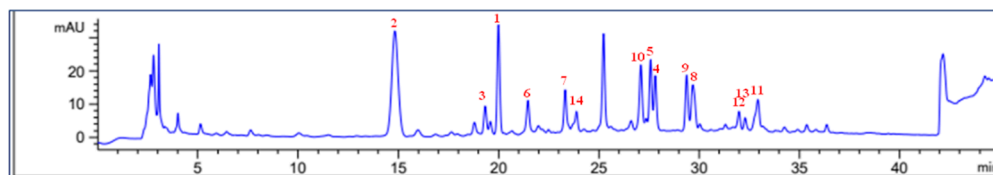

Compound 1

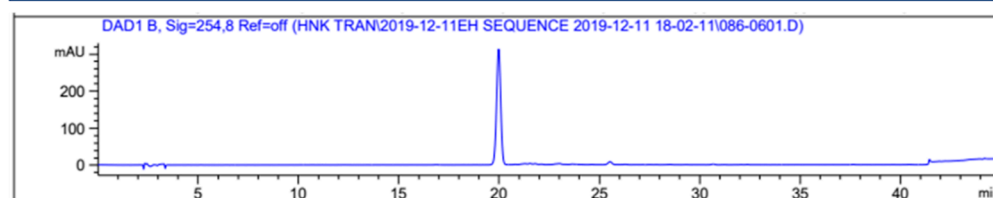

**Figure S3.10.** LC-MS analysis of compound **1** compared to 30% extract

27 #1783 RT: 7.95 AV: 1 NL: 1.10E8  
T: FTMS+cESI Full ms [150.0000-1000.0000]

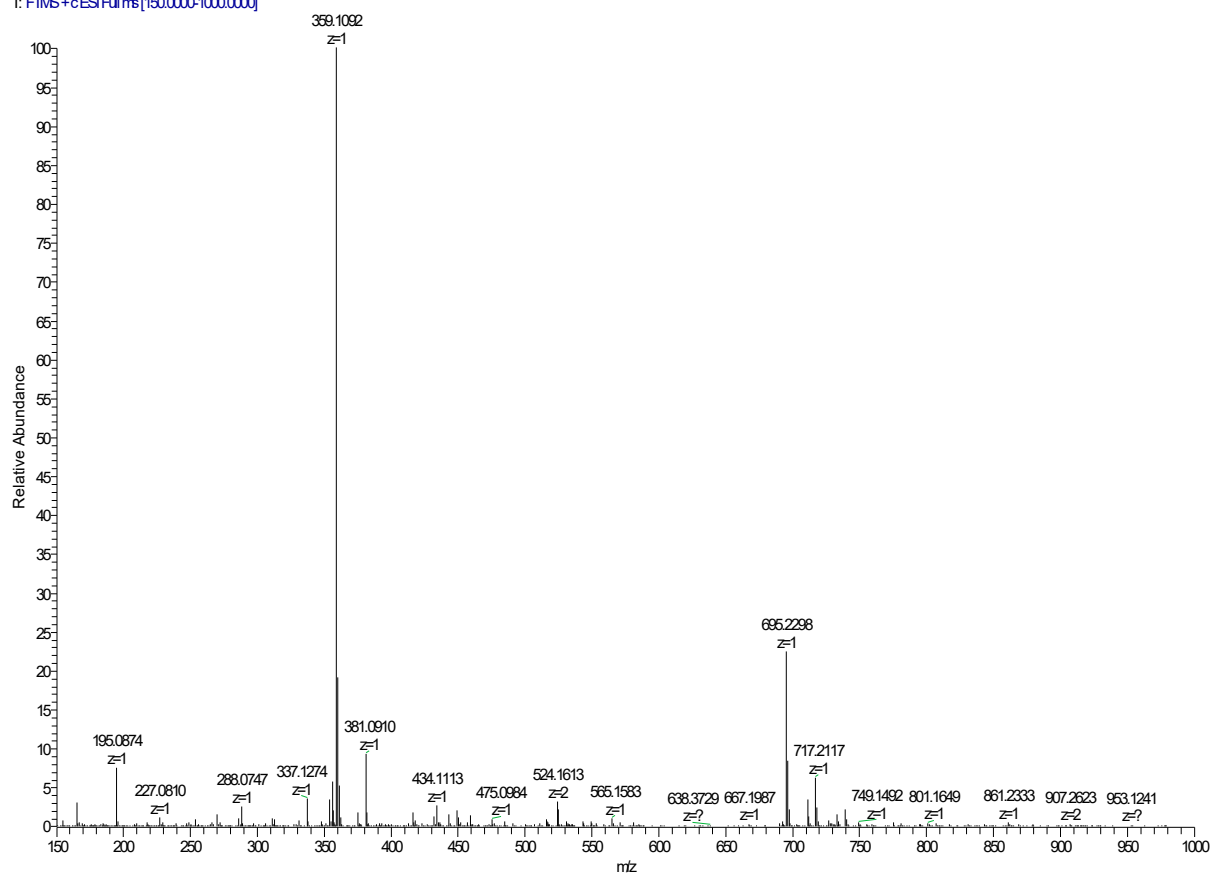

Elemental composition search on mass 359.11

m/z = 354.11-364.11

| m/z      | Theo. Mass | Delta (ppm) | RDB equiv. | Composition                                                    |
|----------|------------|-------------|------------|----------------------------------------------------------------|
| 359.1092 | 359.1101   | -2.60       | 7.5        | C <sub>17</sub> H <sub>20</sub> O <sub>7</sub> Na              |
|          | 359.1077   | 4.10        | 4.5        | C <sub>15</sub> H <sub>21</sub> O <sub>7</sub> Na <sub>2</sub> |
|          | 359.1067   | 7.06        | 19.5       | C <sub>26</sub> H <sub>15</sub> O <sub>2</sub>                 |
|          | 359.1125   | -9.30       | 10.5       | C <sub>19</sub> H <sub>19</sub> O <sub>7</sub>                 |
|          | 359.1053   | 10.79       | 1.5        | C <sub>13</sub> H <sub>22</sub> O <sub>7</sub> Na <sub>3</sub> |
|          | 359.1043   | 13.75       | 16.5       | C <sub>24</sub> H <sub>16</sub> O <sub>2</sub> Na              |
|          | 359.1158   | -18.29      | -0.5       | C <sub>13</sub> H <sub>24</sub> O <sub>4</sub> Na <sub>5</sub> |
|          | 359.1018   | 20.45       | 13.5       | C <sub>22</sub> H <sub>17</sub> O <sub>2</sub> Na <sub>2</sub> |
|          | 359.1182   | -24.99      | 2.5        | C <sub>15</sub> H <sub>23</sub> O <sub>4</sub> Na <sub>4</sub> |
|          | 359.1184   | -25.65      | 1.5        | C <sub>12</sub> H <sub>23</sub> O <sub>12</sub>                |

Figure S4.1. HR-ESIMS spectrum of compound 10

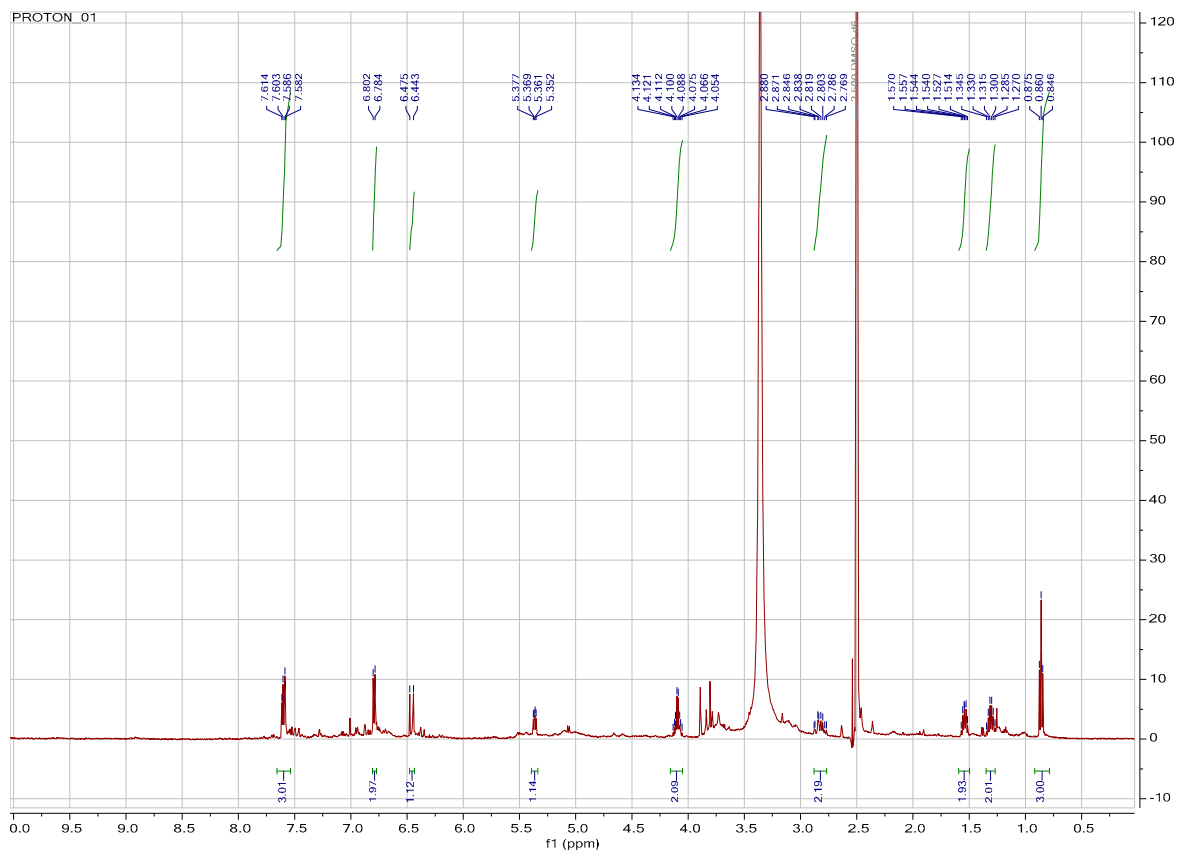

**Figure S4.2.**  $^1\text{H}$ -NMR spectrum of compound **10** in  $\text{DMSO-}d_6$  at 500 MHz

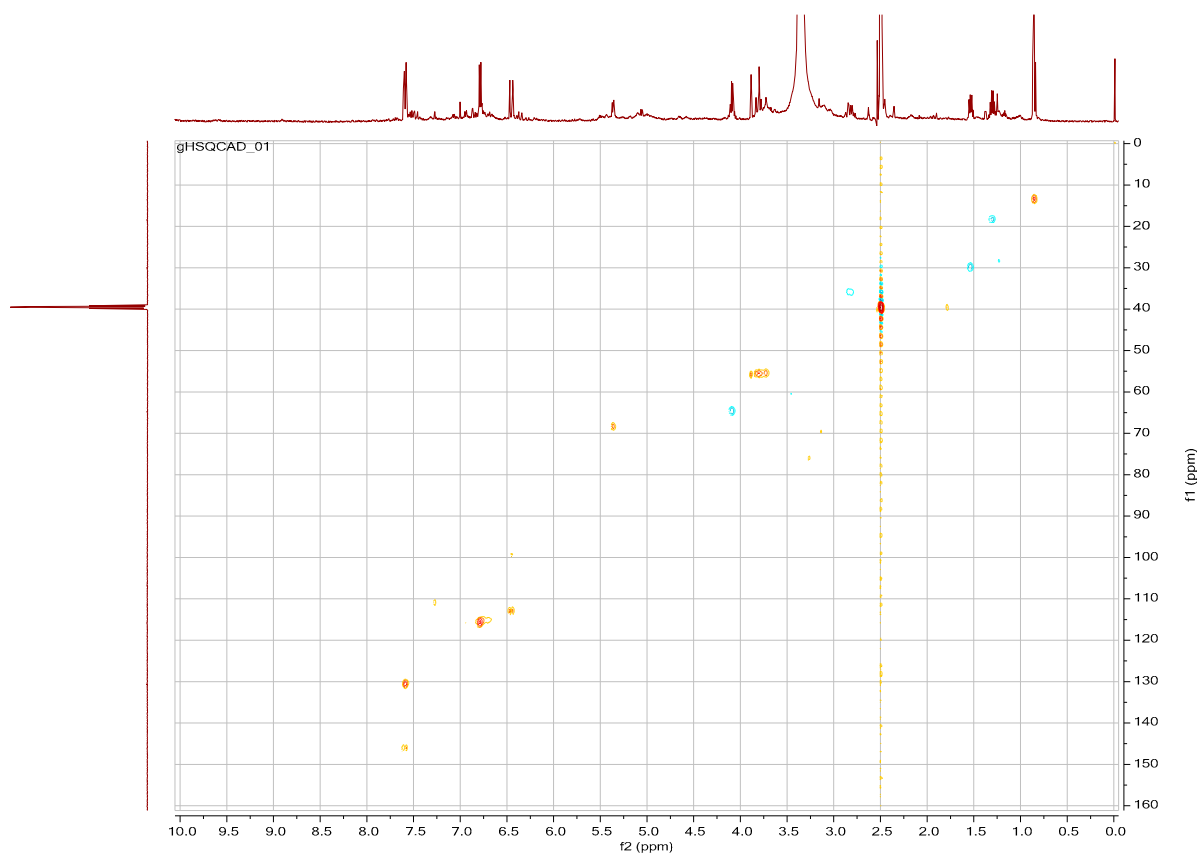

**Figure S4.3.** HSQC spectrum of compound **10** in  $\text{DMSO-}d_6$

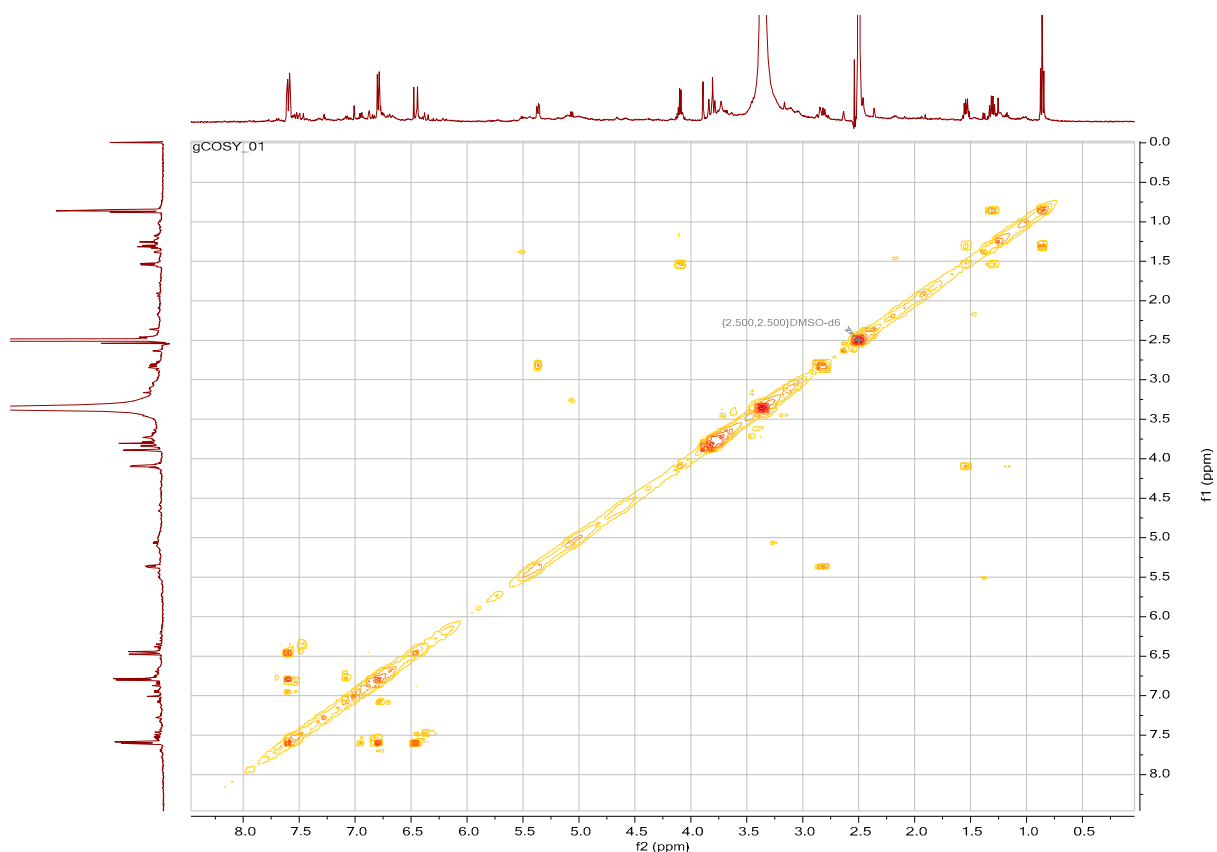

**Figure S4.4.** COSY spectrum of compound **10** in DMSO- $d_6$

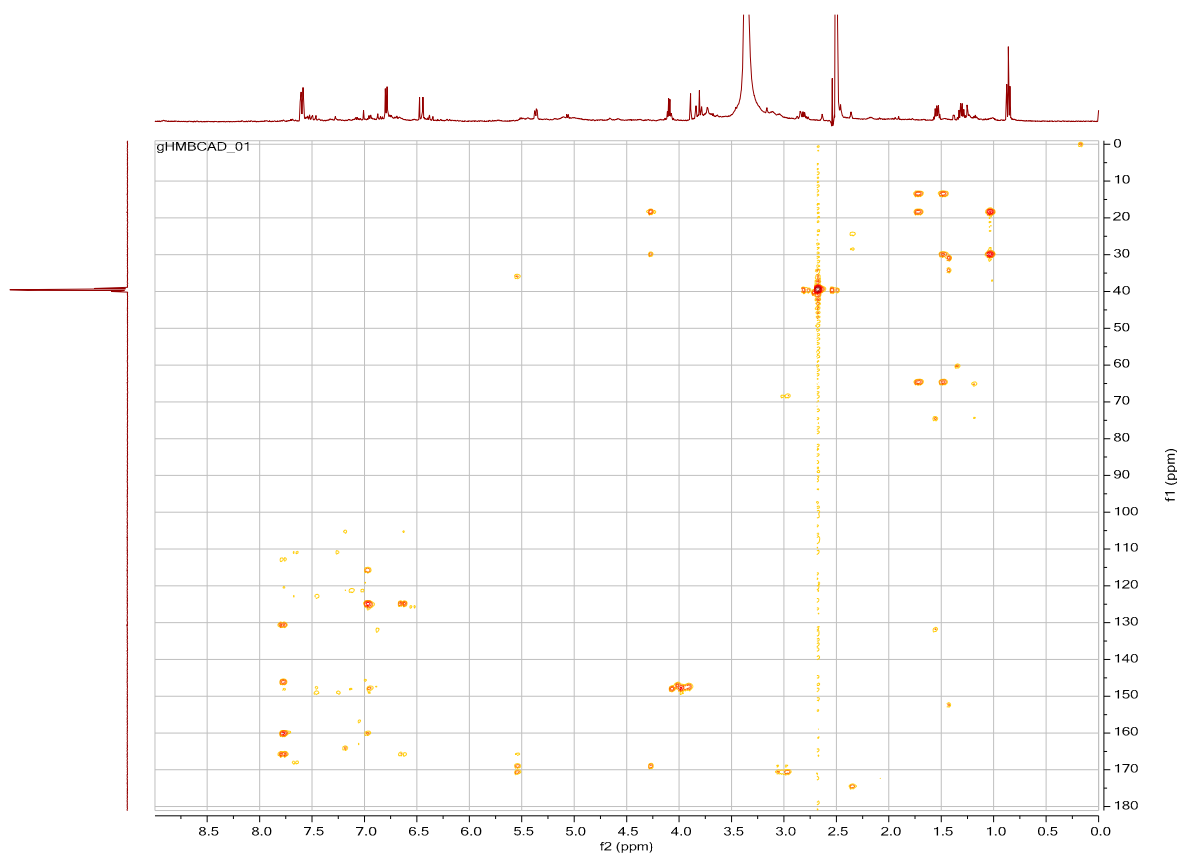

**Figure S4.5.** HMBC spectrum of compound **10** in DMSO- $d_6$

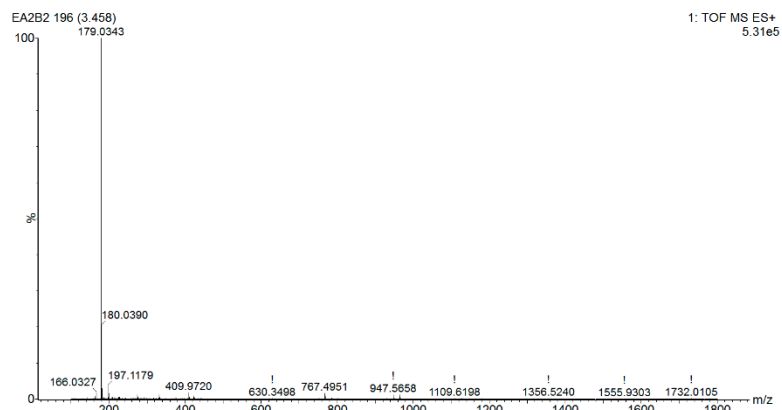

#### Elemental Composition Report

Page 1

#### Single Mass Analysis

Tolerance = 5.0 mDa / DBE: min = -1.5, max = 50.0

Element prediction: Off

Number of isotope peaks used for i-FIT = 3

Monoisotopic Mass, Even Electron Ions

27 formula(e) evaluated with 1 results within limits (all results (up to 1000) for each mass)

Elements Used:

C: 0-500 H: 0-1000 O: 0-20

EA2B2 196 (3.458)

1: TOF MS ES+

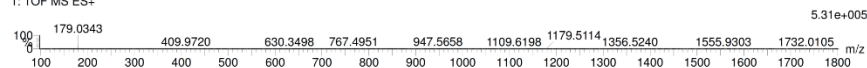

Minimum: -1.5

Maximum: 50.0

Mass Calc. Mass mDa PPM DBE i-FIT Norm Conf(%) Formula

179.0343 179.0344 -0.1 -0.6 6.5 754.8 n/a n/a C9 H7 O4

**Figure S5.1.** HR-ESIMS spectrum of compound **11**



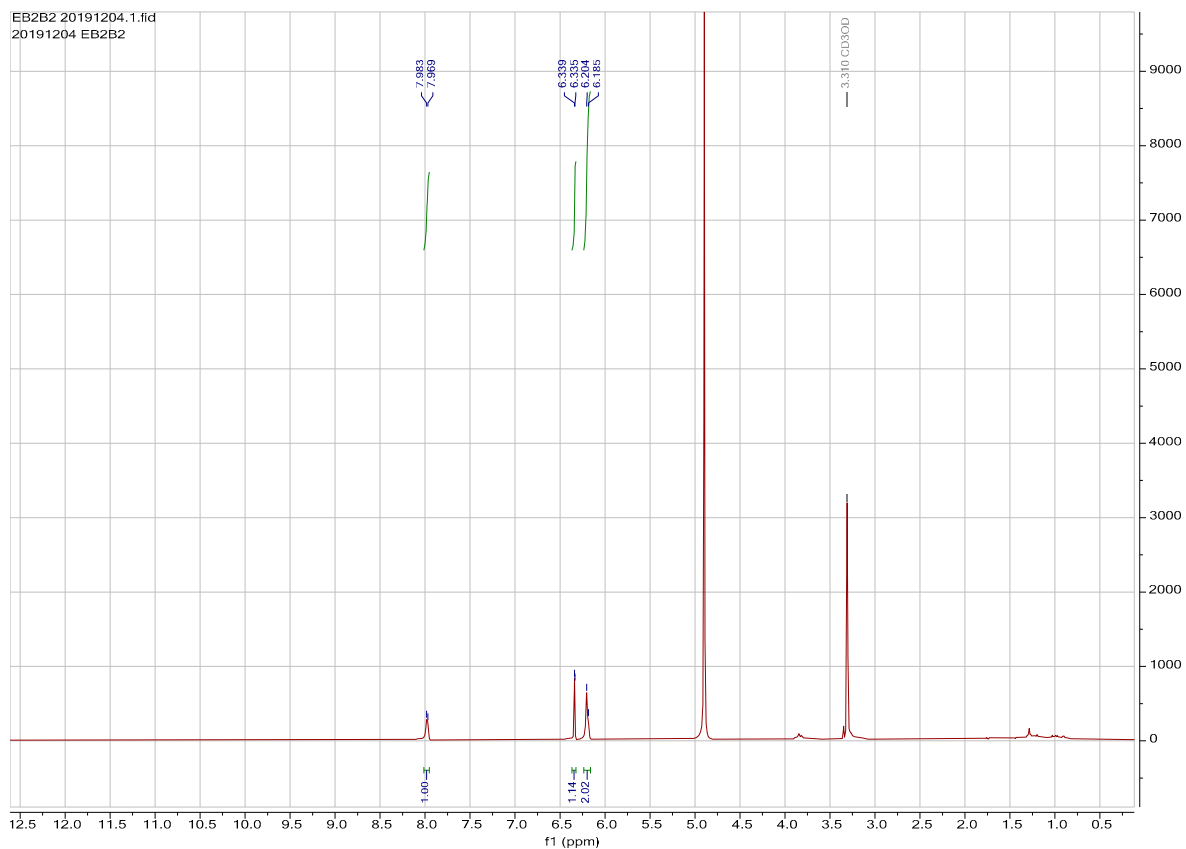

**Figure S5.2.**  $^1\text{H}$ -NMR spectrum of compound **11** in methanol- $d_4$  at 400 MHz

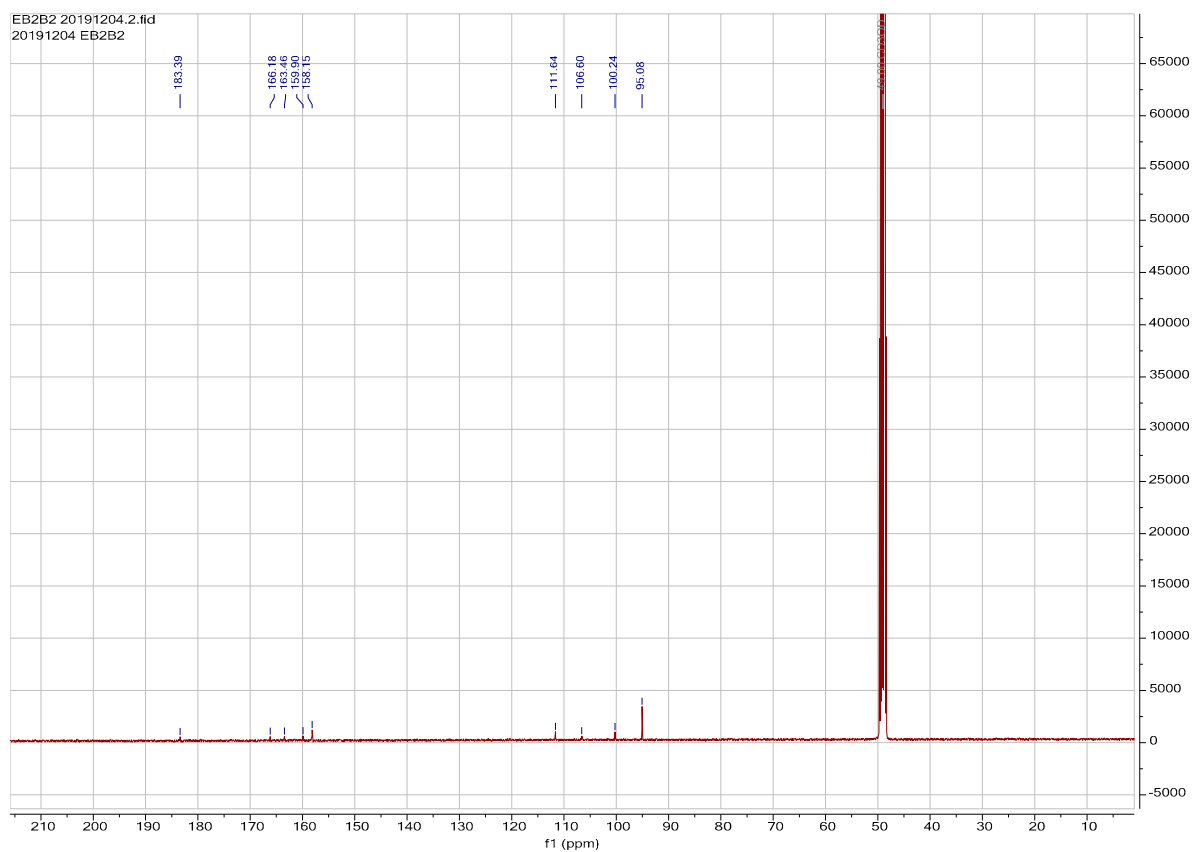

**Figure S5.3.**  $^{13}\text{C}$ -NMR spectrum of compound **11** in methanol- $d_4$  at 100 MHz

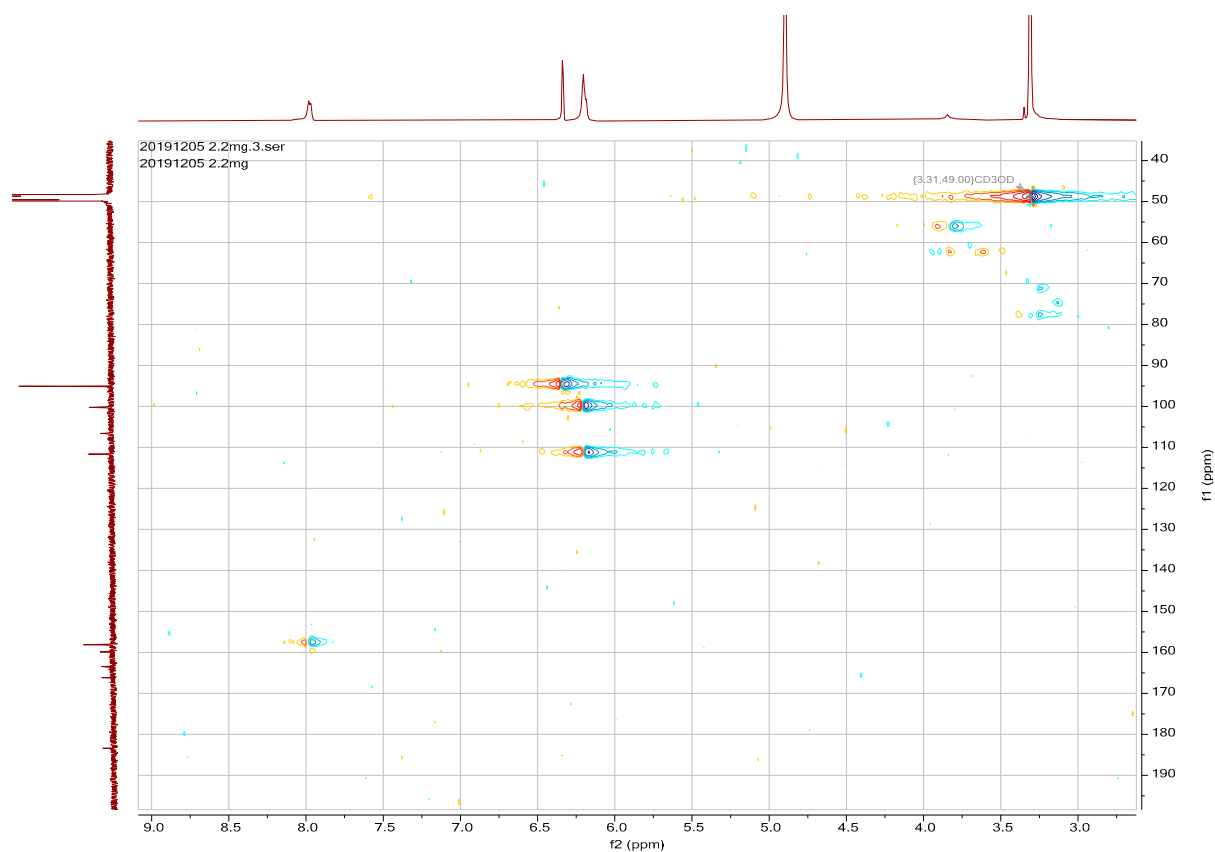

**Figure S5.4.** HSQC spectrum of compound **11** in methanol-*d*<sub>4</sub>

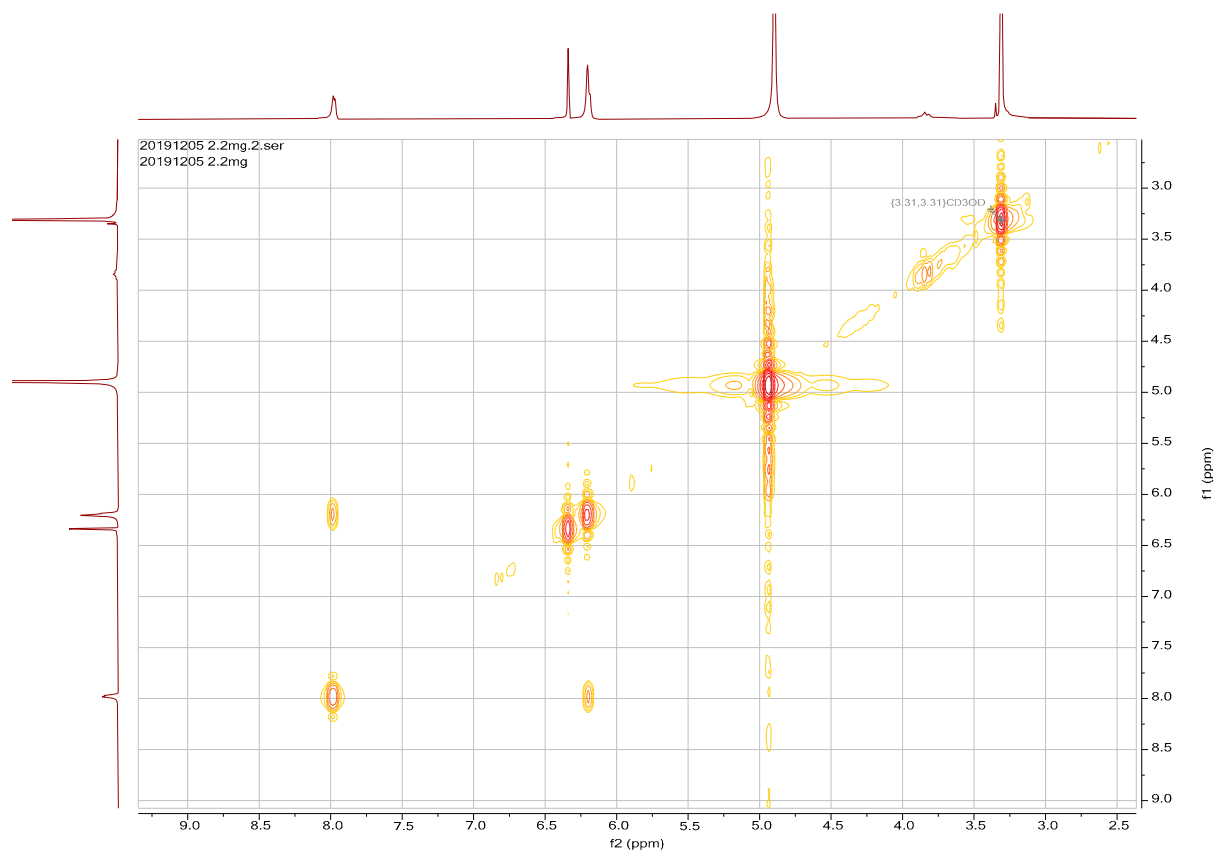

**Figure S5.5.** COSY spectrum of compound **11** in methanol-*d*<sub>4</sub>

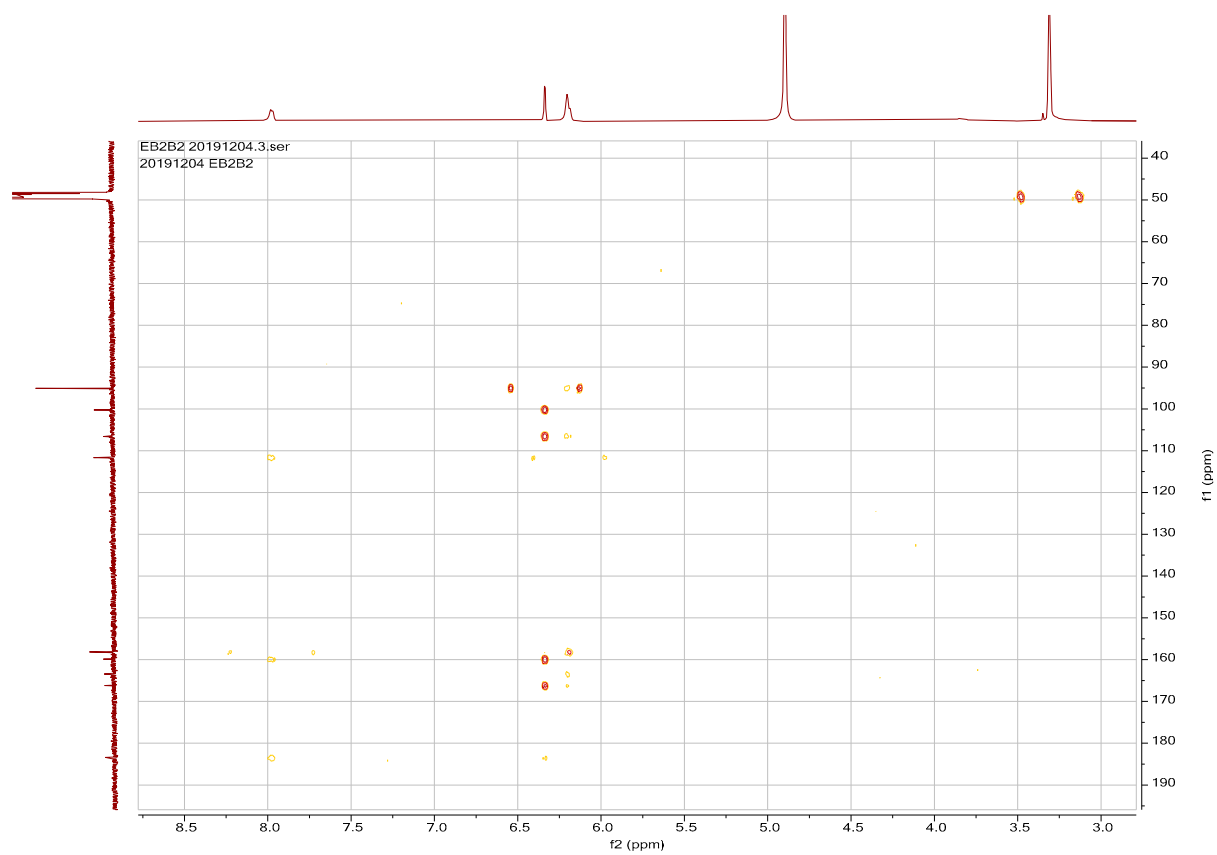

**Figure S5.6.** HMBC spectrum of compound **11** in methanol- $d_4$

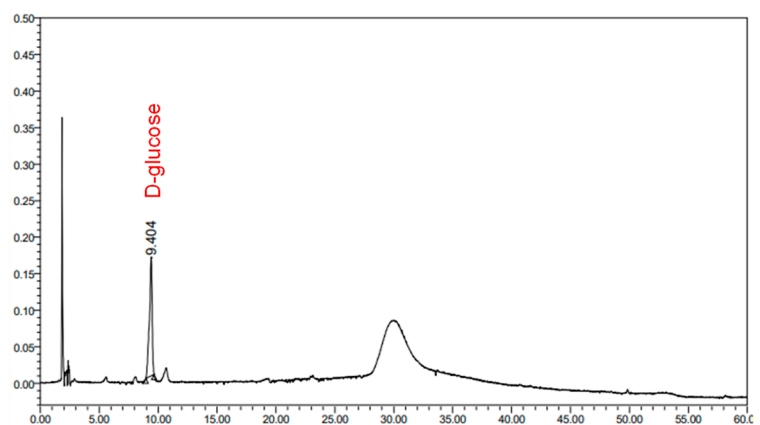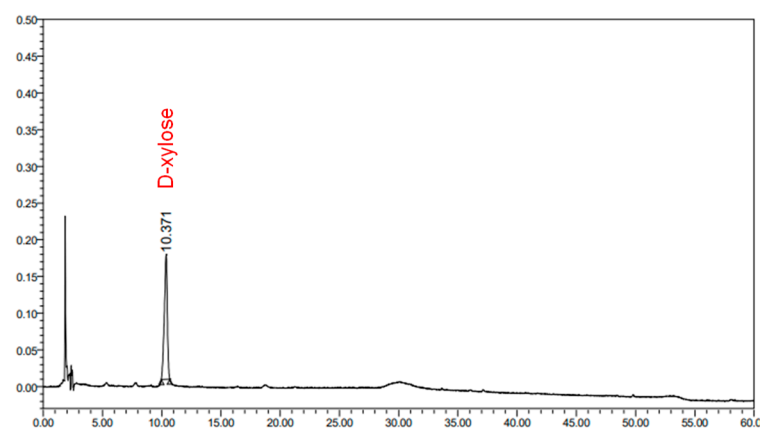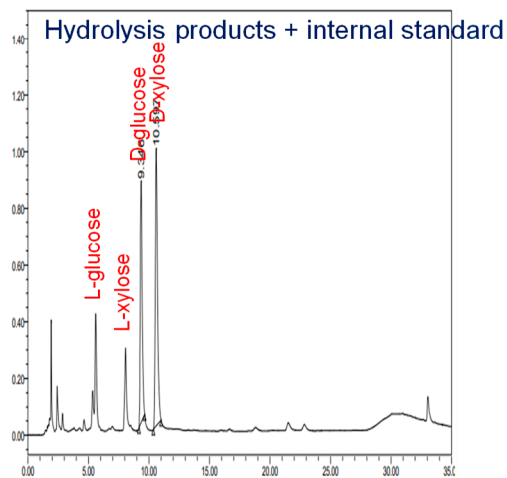

**Figure S6.** HPLC pattern of sugar

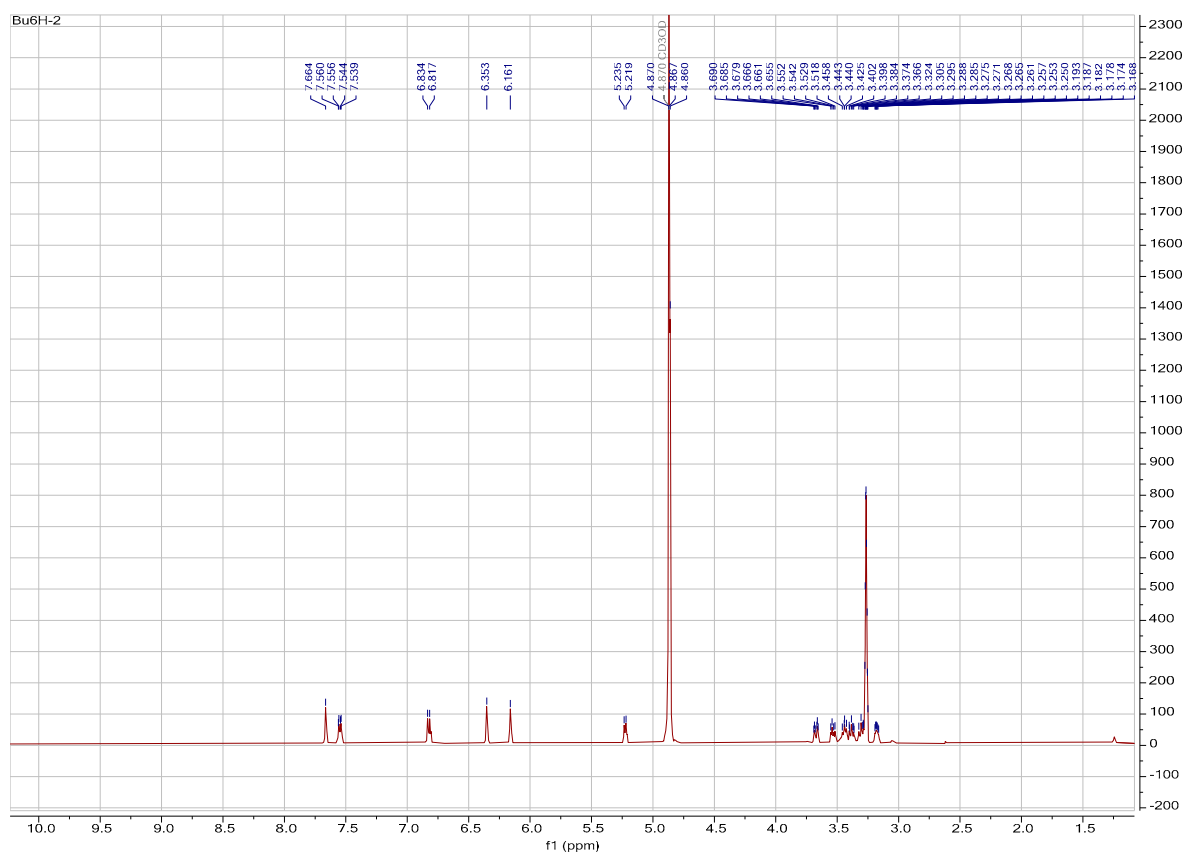

**Figure S7.1.**  $^1\text{H}$ -NMR spectrum of compound **3** in methanol- $d_4$  at 400 MHz

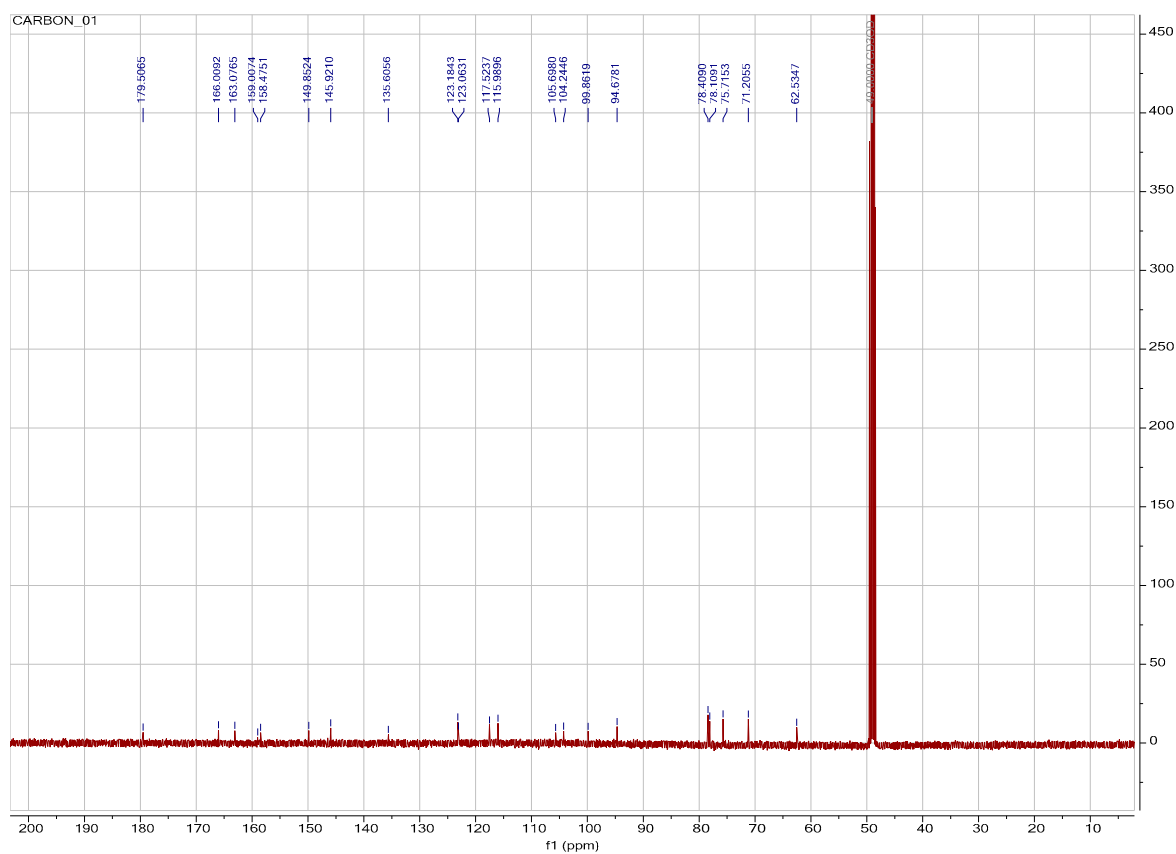

**Figure S7.2.**  $^{13}\text{C}$ -NMR spectrum of compound **3** in methanol- $d_4$  at 100 MHz

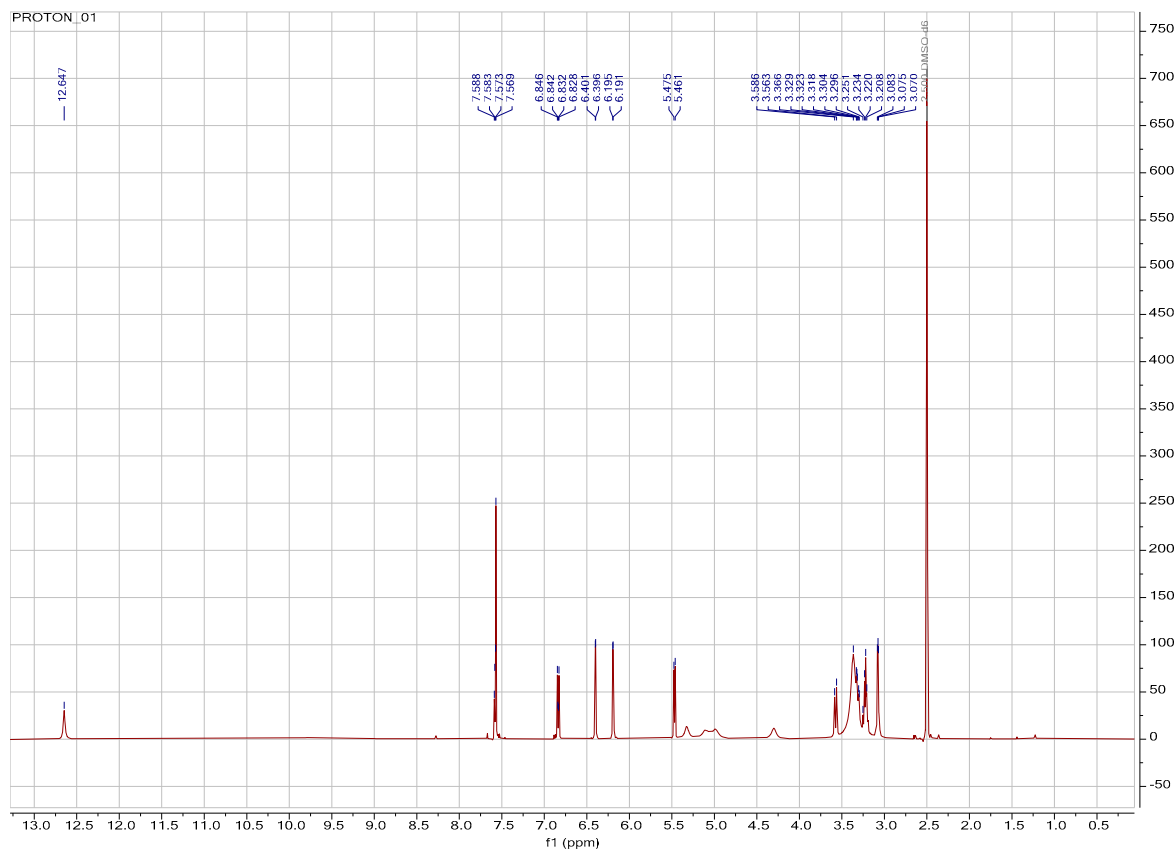

**Figure S8.1.**  $^1\text{H}$ -NMR spectrum of compound **4** in  $\text{DMSO}-d_6$  at 400 MHz

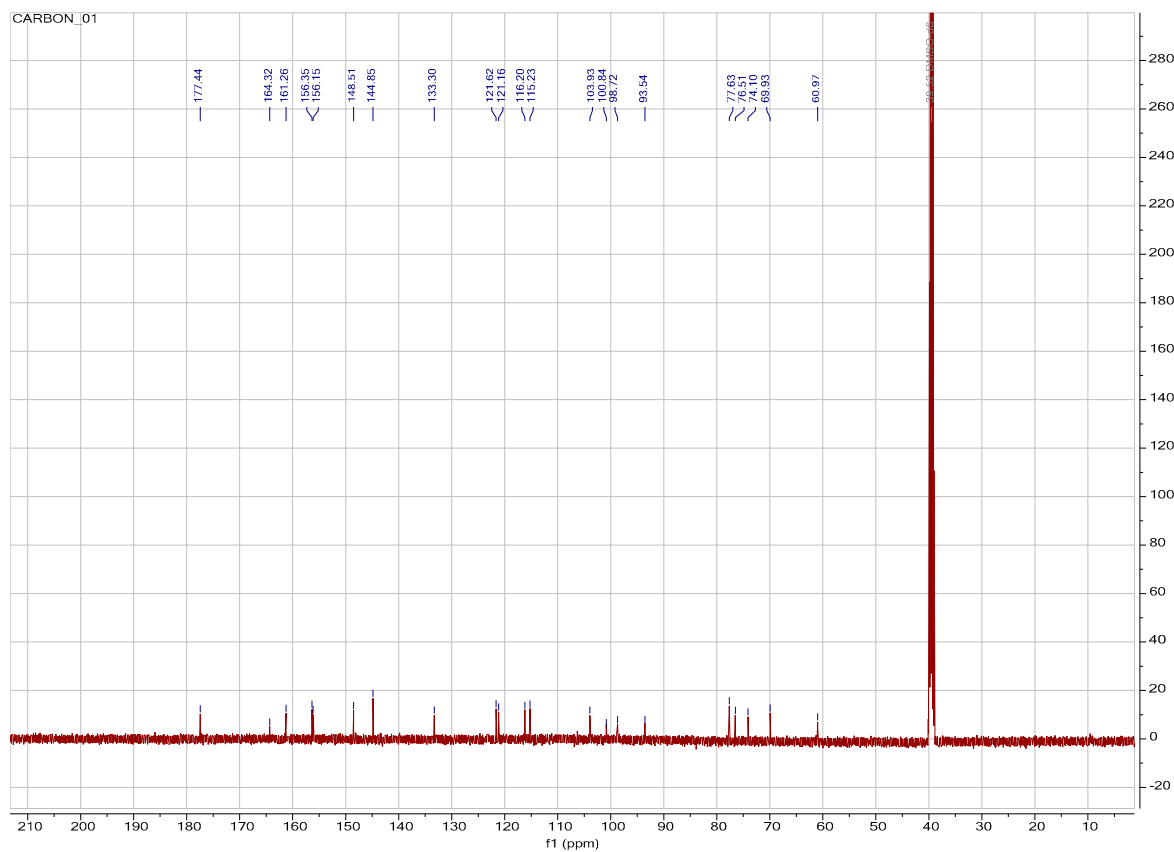

**Figure S8.2.**  $^{13}\text{C}$ -NMR spectrum of compound **4** in  $\text{DMSO}-d_6$  at 100 MHz

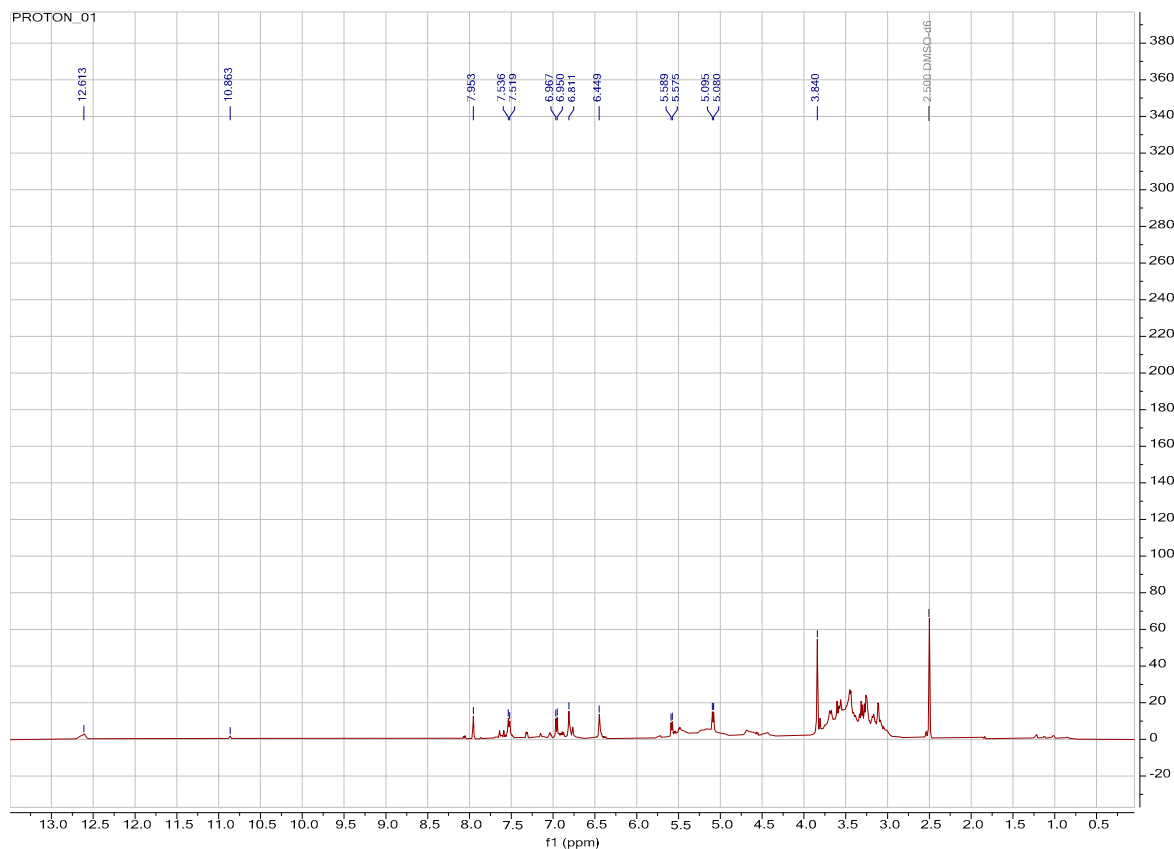

**Figure S9.1.**  $^1\text{H}$ -NMR spectrum of compound **5** in  $\text{DMSO-}d_6$  at 400 MHz

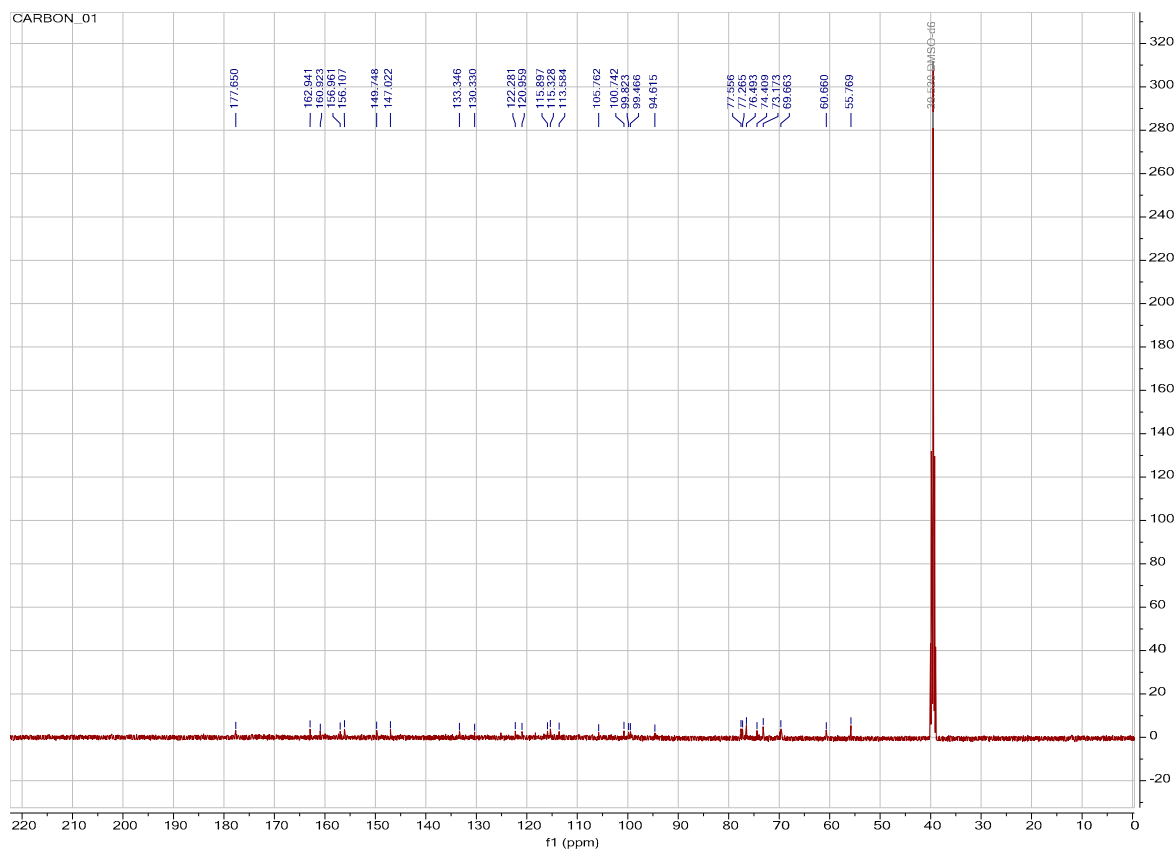

**Figure S9.2.**  $^{13}\text{C}$ -NMR spectrum of compound **5** in  $\text{DMSO-}d_6$  at 100 MHz

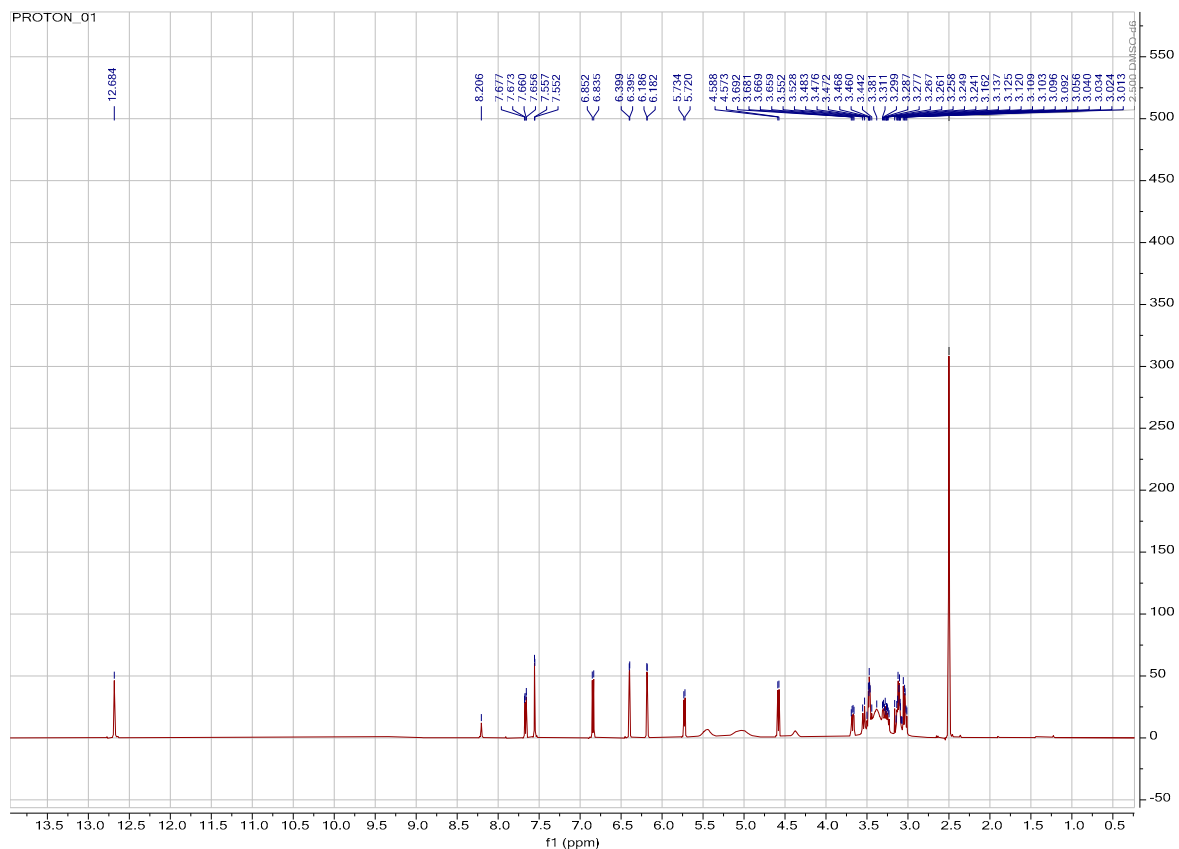

**Figure S10.1.**  $^1\text{H}$ -NMR spectrum of compound **6** in  $\text{DMSO}-d_6$  at 400 MHz

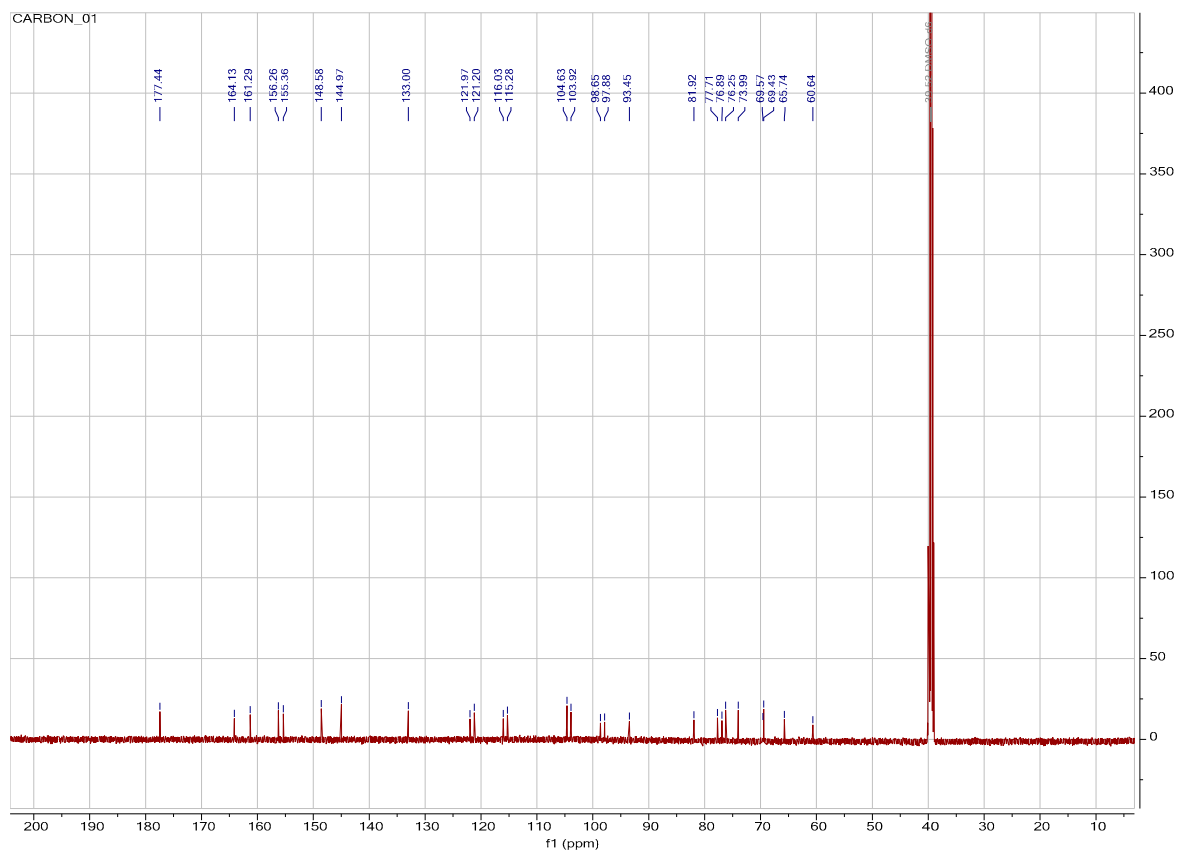

**Figure S10.2.**  $^{13}\text{C}$ -NMR spectrum of compound **6** in  $\text{DMSO}-d_6$  at 100 MHz



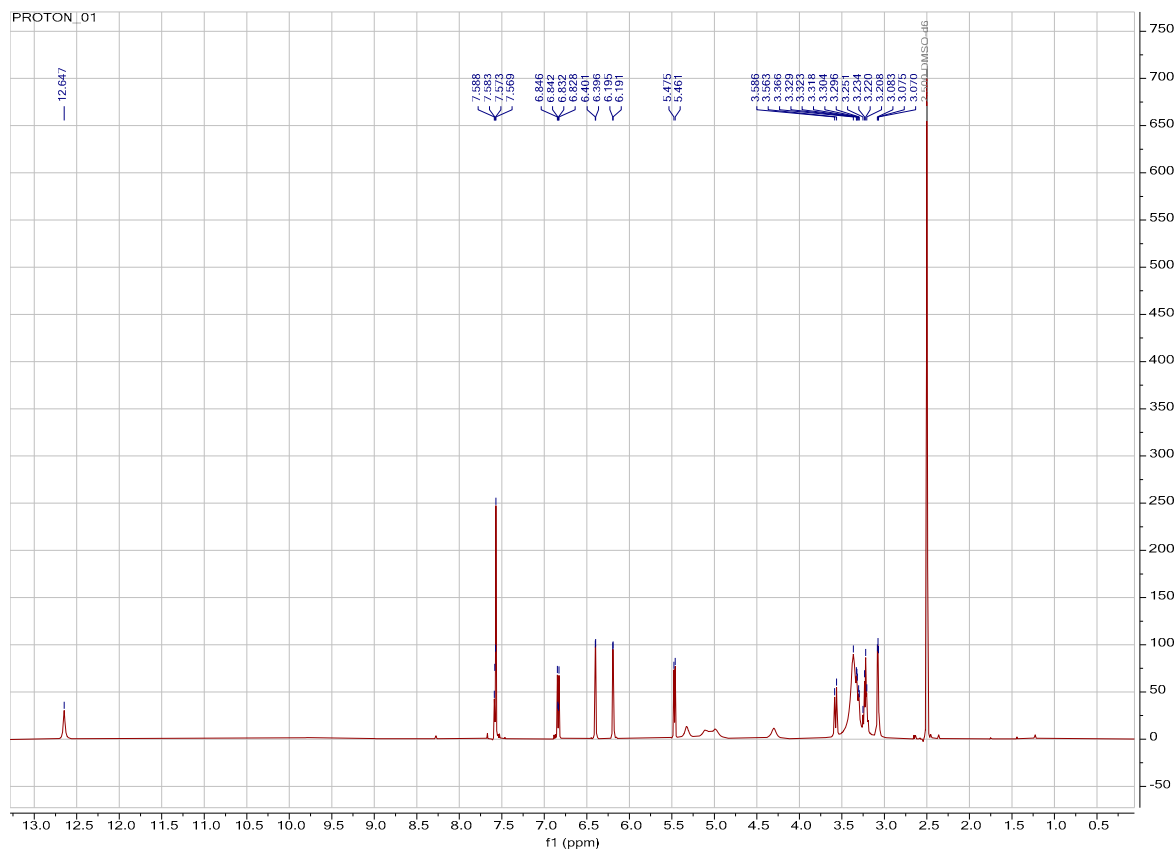

**Figure S11.1.**  $^1\text{H}$ -NMR spectrum of compound **7** in  $\text{DMSO-}d_6$  at 400 MHz

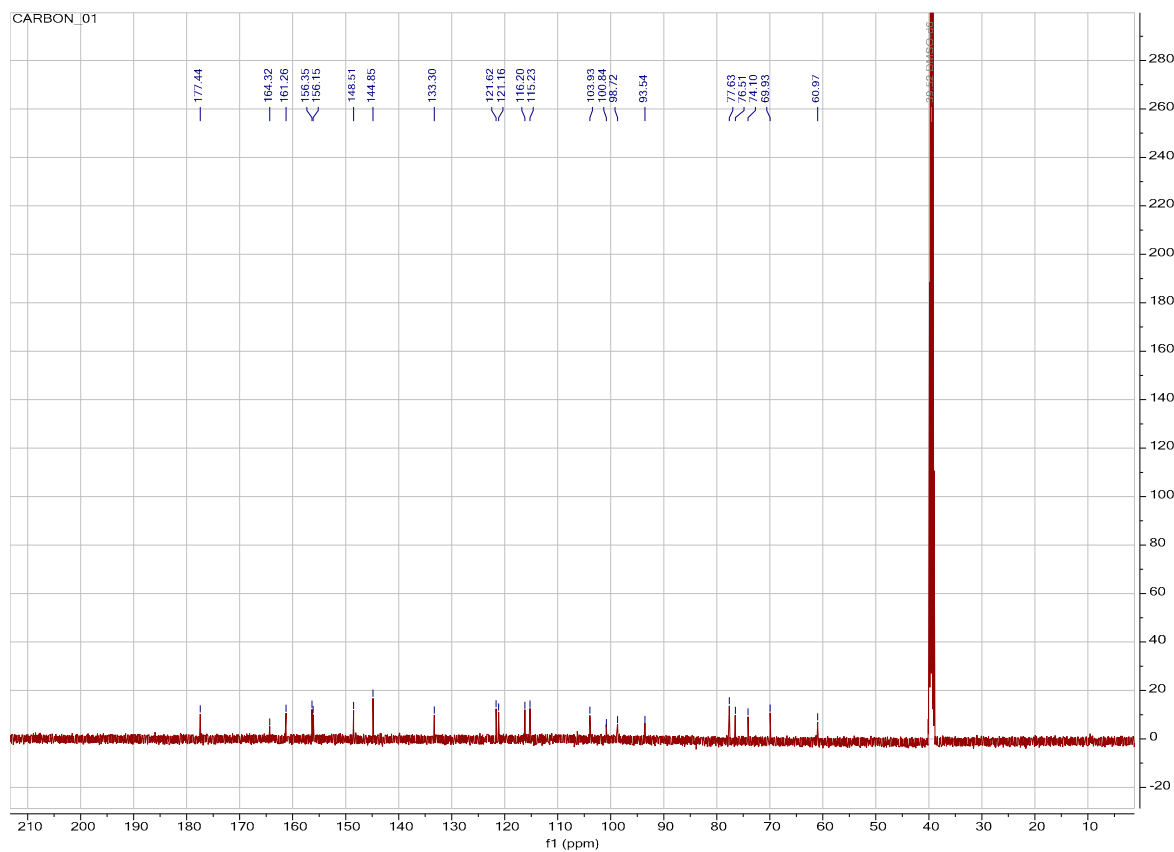

**Figure S11.2.**  $^{13}\text{C}$ -NMR spectrum of compound **7** in  $\text{DMSO-}d_6$  at 100 MHz

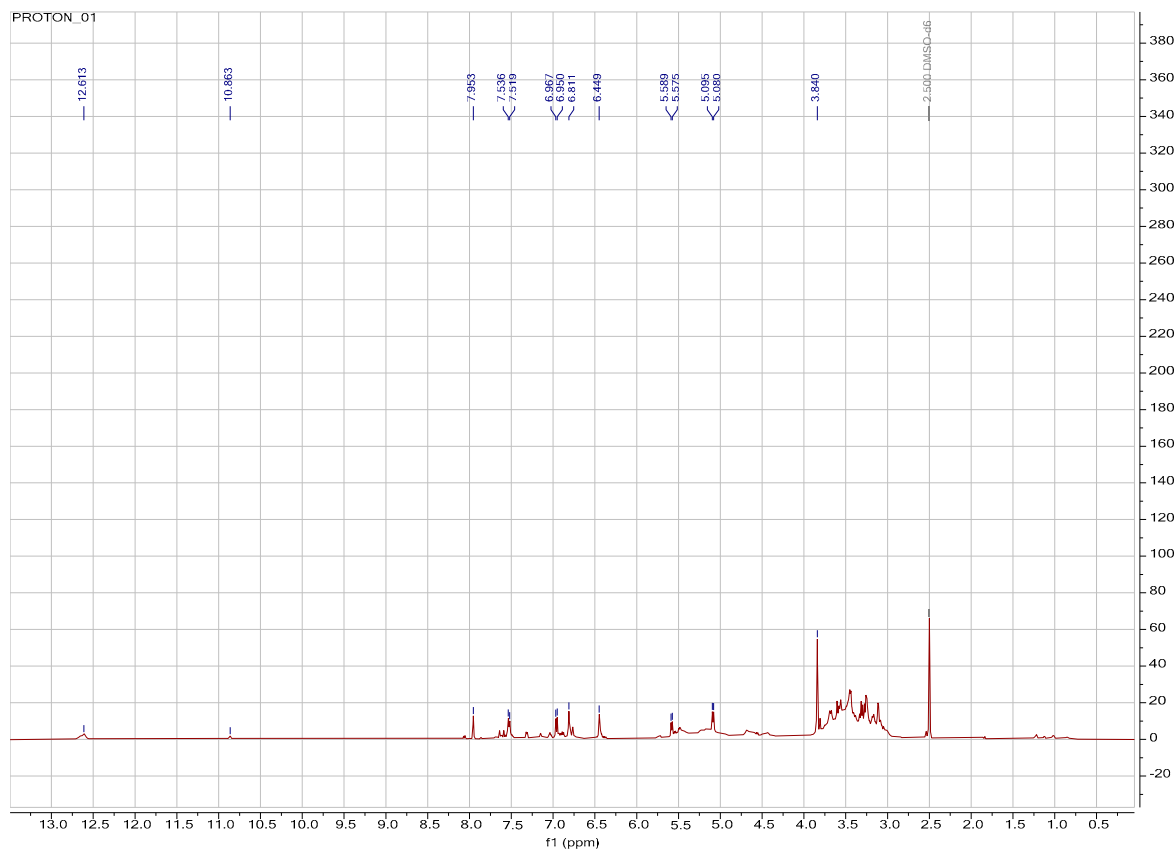

**Figure S12.1.**  $^1\text{H}$ -NMR spectrum of compound **8** in  $\text{DMSO-}d_6$  at 400 MHz

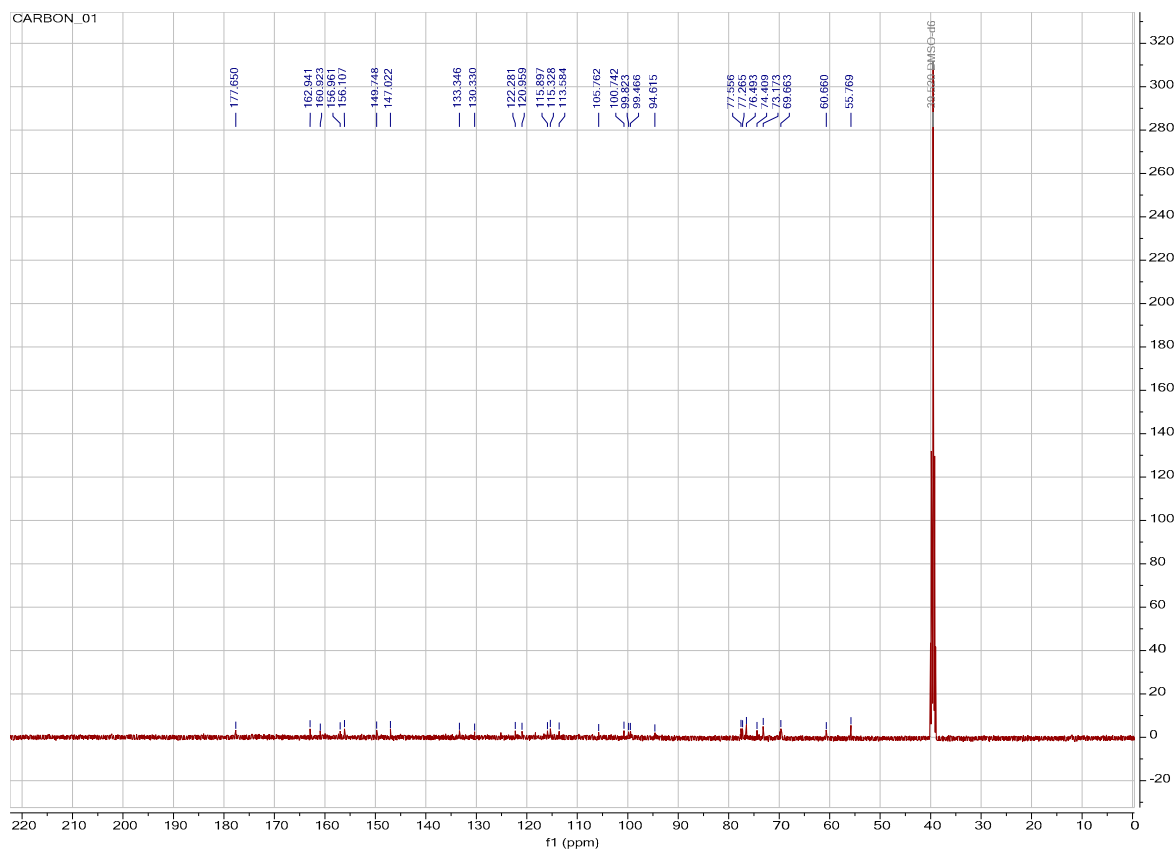

**Figure S12.2.**  $^{13}\text{C}$ -NMR spectrum of compound **8** in  $\text{DMSO-}d_6$  at 100 MHz

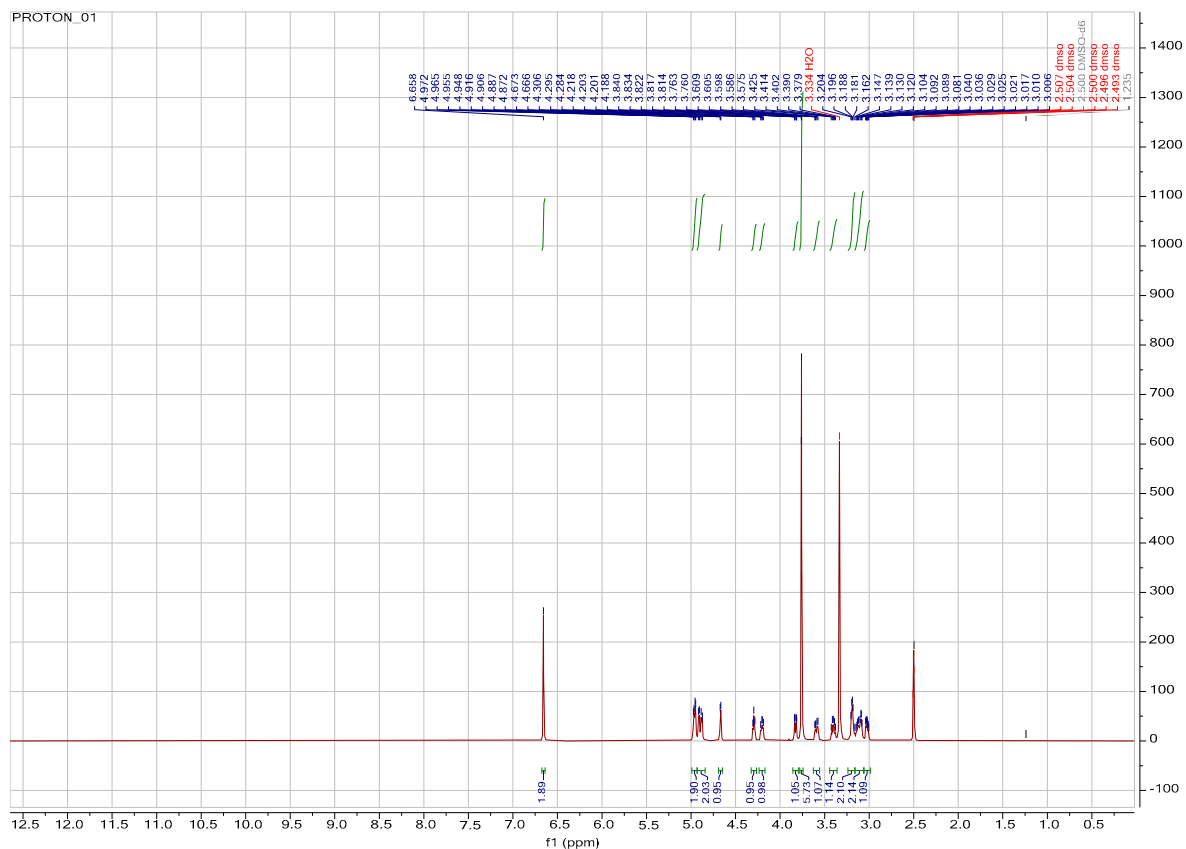

**Figure S13.1.**  $^1\text{H}$ -NMR spectrum of compound **9** in  $\text{DMSO-}d_6$  at 400 MHz

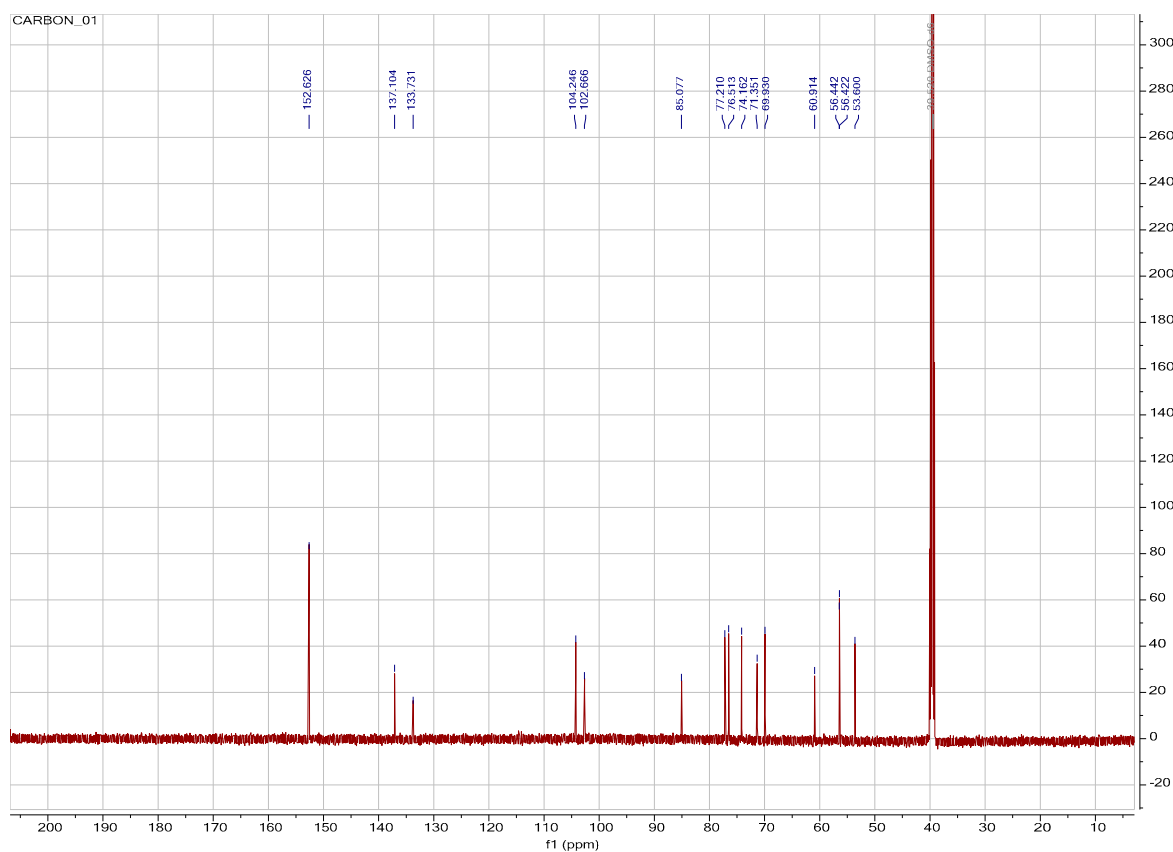

**Figure S13.2.**  $^{13}\text{C}$ -NMR spectrum of compound **9** in  $\text{DMSO-}d_6$  at 100 MHz

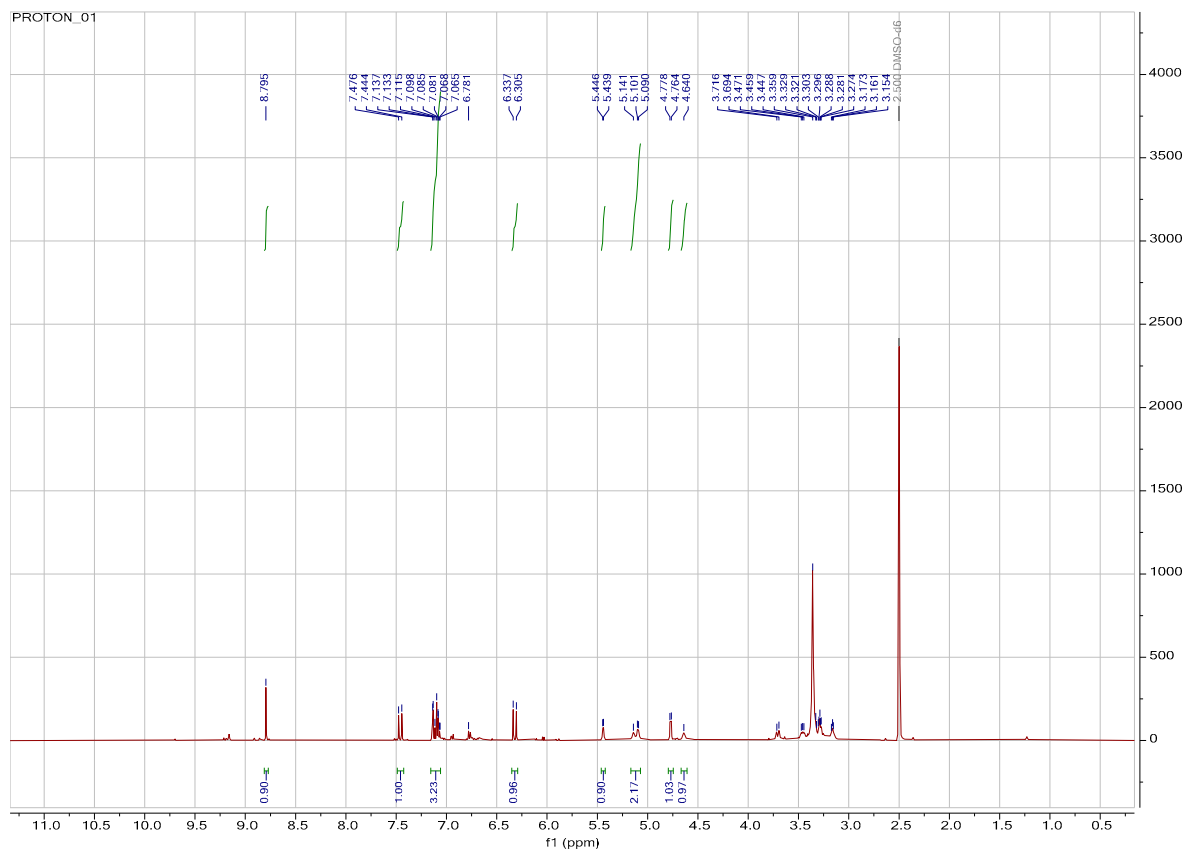

**Figure S14.1.**  $^1\text{H}$ -NMR spectrum of compound **12** in  $\text{DMSO}-d_6$  at 400 MHz

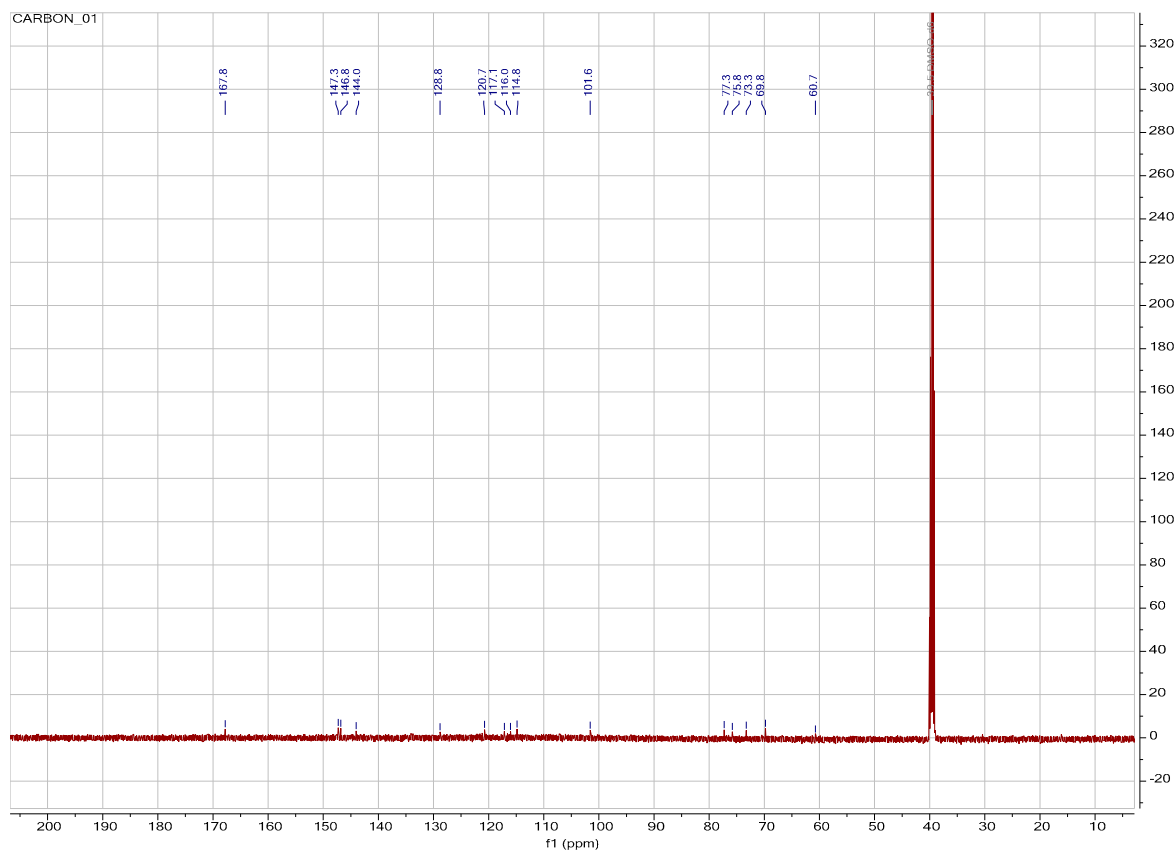

**Figure S14.2.**  $^{13}\text{C}$ -NMR spectrum of compound **12** in  $\text{DMSO}-d_6$  at 100 MHz

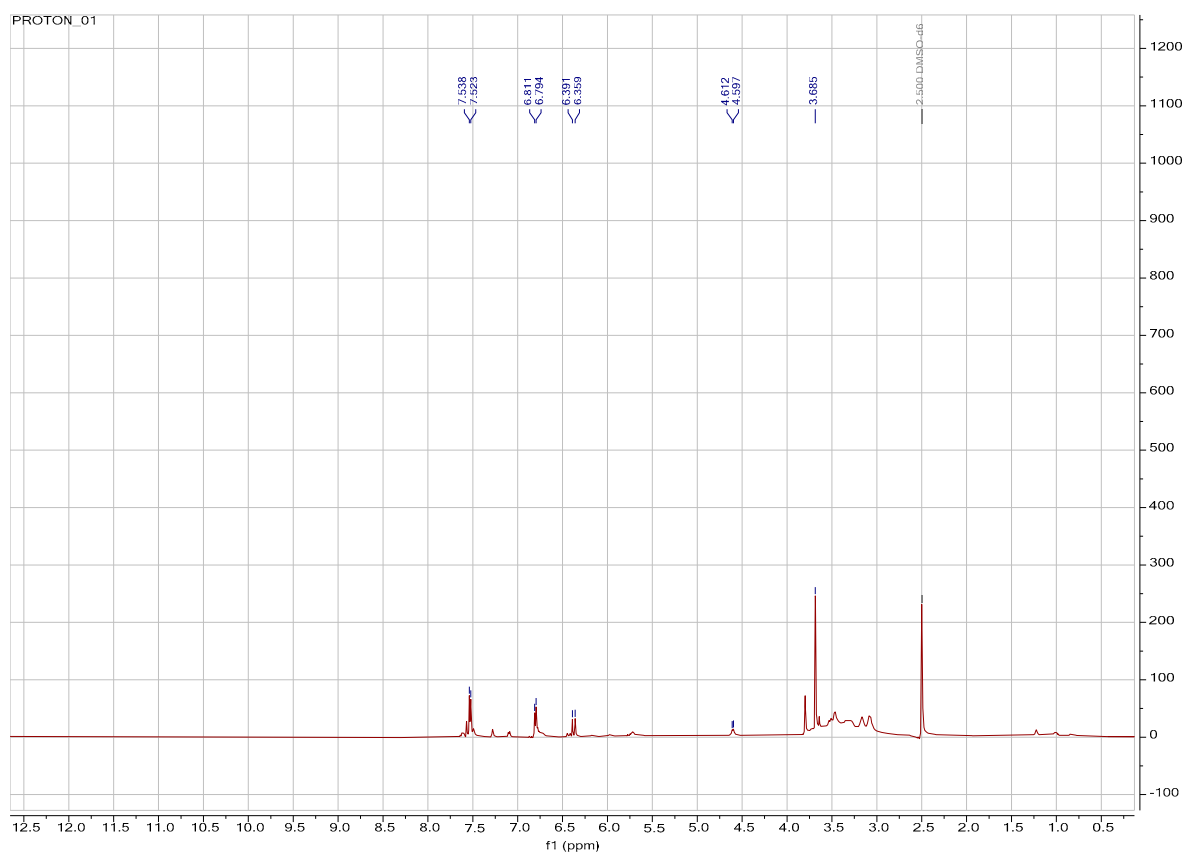

**Figure S15.1.**  $^1\text{H}$ -NMR spectrum of compound **13** in  $\text{DMSO-}d_6$  at 400 MHz

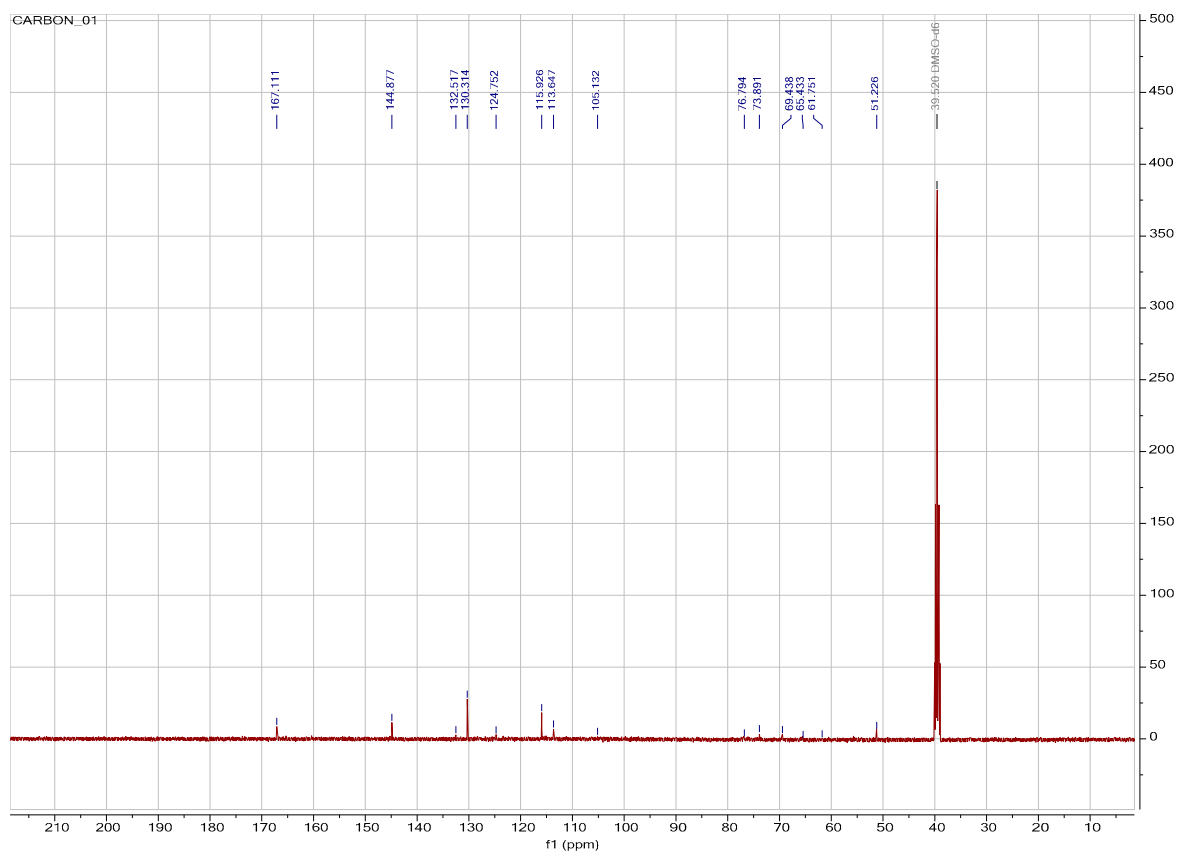

**Figure S15.2.**  $^{13}\text{C}$ -NMR spectrum of compound **13** in  $\text{DMSO-}d_6$  at 100 MHz

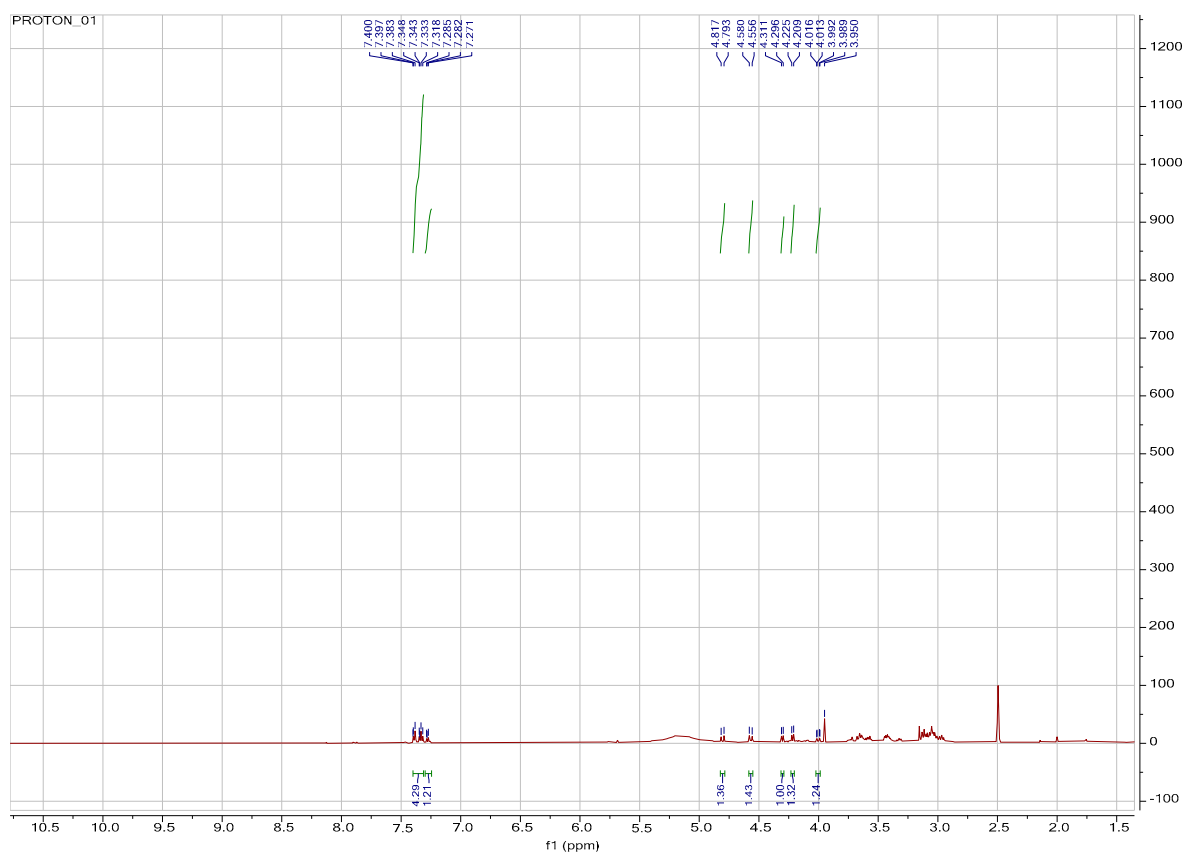

**Figure S16.1.**  $^1\text{H}$ -NMR spectrum of compound **14** in  $\text{DMSO-}d_6$  at 400 MHz

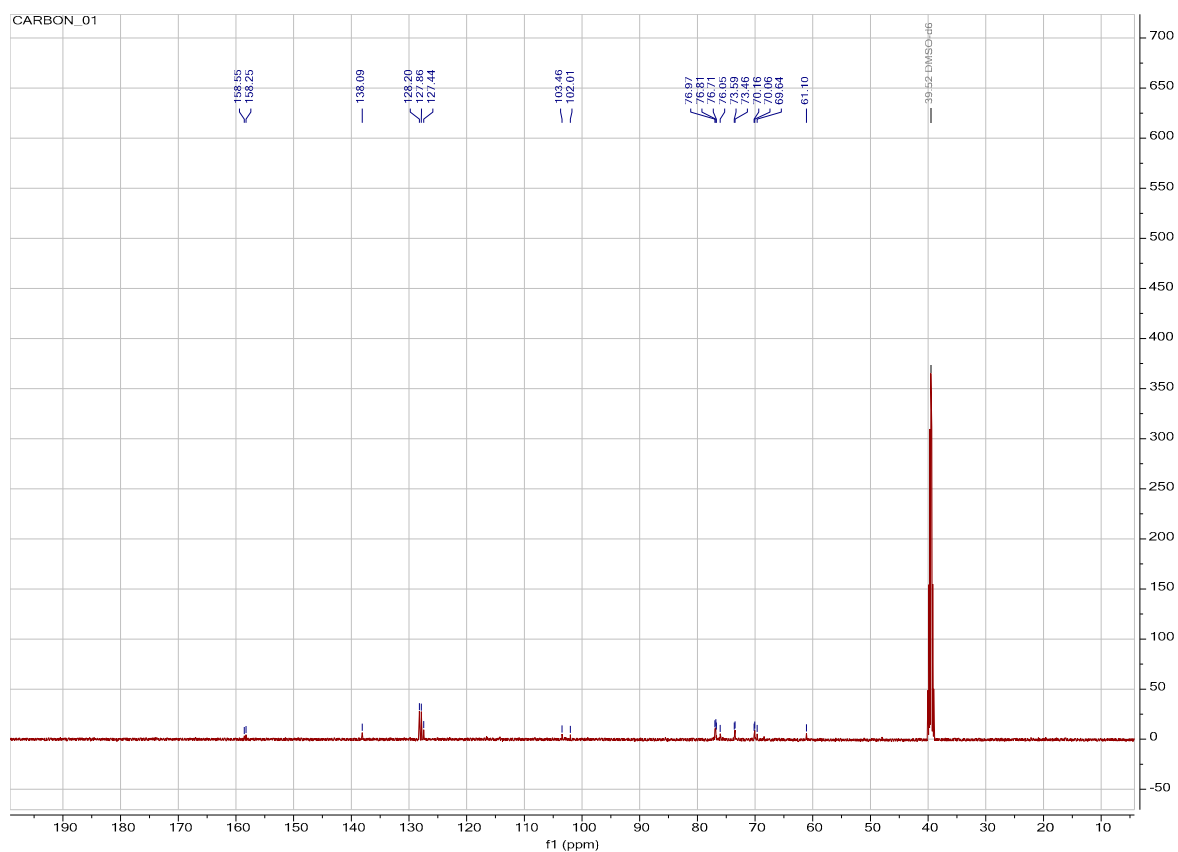

**Figure S16.2.**  $^{13}\text{C}$ -NMR spectrum of compound **14** in  $\text{DMSO-}d_6$  at 100 MHz
